# Supplementary material for: Strong visible light-absorbing BODIPY-based Cu(i) cyclic trinuclear sensitizer for photocatalysis
Source: Royal Society of Chemistry journal article supplement (doi:10.1039/d2qi00353h), 2022-01-01
Supplement: d2qi00353h1.pdf [file d2qi00353h1.pdf]

*Electronic Supplementary Information (ESI)*

for

**Strong visible-light-absorbing BODIPY-based Cu(I) cyclic trinuclear sensitizers  
for photocatalysis**

Ri-Qin Xia,<sup>a†</sup> Ji Zheng,<sup>a†</sup> Rong-Jia Wei,<sup>a</sup> Jiaying He,<sup>b</sup> Dong-Qin Ye,<sup>a</sup> Ming-De Li,<sup>\*b</sup>  
Guo-Hong Ning<sup>a\*</sup> and Dan Li<sup>a\*</sup>

<sup>a</sup>College of Chemistry and Materials Science, Guangdong Provincial Key Laboratory of Functional Supramolecular Coordination Materials and Applications, Jinan University, Guangzhou 510632, People's Republic of China.

<sup>b</sup>Department of Chemistry and Key Laboratory for Preparation and Application of Ordered Structural Materials of Guangdong Province, Shantou University, Shantou, 515063, China.

E-mail: [mdli@stu.edu.cn](mailto:mdli@stu.edu.cn); [guohongning@jnu.edu.cn](mailto:guohongning@jnu.edu.cn), [danli@jnu.edu.cn](mailto:danli@jnu.edu.cn).

## Contents

|                                                         |           |
|---------------------------------------------------------|-----------|
| <b>Section S1. Materials and Methods</b> .....          | <b>2</b>  |
| 1.1. Materials .....                                    | 2         |
| 1.2. Characterization .....                             | 2         |
| <b>Section S2. Synthesis</b> .....                      | <b>4</b>  |
| 2.1. Synthesis of <b>HL, 1, 2</b> .....                 | 4         |
| 2.2. PMMA film fabrication of <b>HL, 1, 2</b> .....     | 6         |
| <b>Section S3. Supplementary Figures</b> .....          | <b>7</b>  |
| 3.1. NMR spectroscopy .....                             | 7         |
| 3.2. Cyclic Voltammetry (CV) .....                      | 11        |
| 3.3. X-ray Photoelectron Spectroscopy (XPS) .....       | 11        |
| 3.4. Single-crystal structure .....                     | 12        |
| 3.5. Thermogravimetric Analysis (TGA) .....             | 15        |
| 3.6. Fourier Transform Infrared (FT-IR) Spectra .....   | 15        |
| 3.7. Power X-ray Diffraction (PXRD) .....               | 16        |
| 3.8. Solution-state UV-Vis Absorption Spectra .....     | 17        |
| 3.9. Solution-state Photoluminescence Spectra .....     | 19        |
| 3.10. Room-Temperature Photoluminescence Lifetime ..... | 20        |
| 3.11. Film-state Photoluminescence Spectra .....        | 21        |
| 3.12. Transient Absorption Spectra (TAs) .....          | 23        |
| 3.13. Computational Details .....                       | 25        |
| 3.14. Photocatalytic reaction .....                     | 33        |
| 3.15. Photooxidation stability test .....               | 50        |
| <b>References</b> .....                                 | <b>52</b> |

## Section S1. Materials and Methods

### 1.1. Materials

Starting materials, reagents, and solvents were purchased from commercial sources and used without further purification.

### 1.2. Characterization

Powder X-ray diffraction (PXRD) data was collected at 40 kV, 30 mA using microcrystalline samples on a Rigaku Ultima IV diffractometer using Cu-K $\alpha$  radiation ( $\lambda = 1.5418 \text{ \AA}$ ). The measurement parameters include a scan speed of  $0.5^\circ/\text{min}$ , a step size of  $0.02^\circ$ , and a scan range of  $2\theta$  from  $3^\circ$  to  $40^\circ$ . Thermogravimetric analysis was performed on a Mettler-Toledo (TGA/DSC1) thermal analyzer. Measurement was made on approximately 5 mg of dried samples under a N<sub>2</sub> flow with a heating rate of  $10^\circ\text{C}/\text{min}$ . Fourier transform infrared (FT-IR) spectrum was measured using a Nicolet Avatar 360 FT-IR spectrophotometer. X-ray photoelectron (XPS) spectroscopy spectra were performed by a Thermo ESCALAB 250XI system. GC-MS analysis was carried out on an Agilent 7890B GC analyzer. Liquid <sup>1</sup>H and <sup>13</sup>C NMR spectra were recorded on a Bruker Biospin Avance (400 MHz) equipment using tetramethylsilane (TMS) as an internal standard. Photooxidation reactions of DHN and thioanisole were performed with a 10 W LED flow reactor WP-TEC-1020HSL (WATTCAS, China), and photooxidation reaction of 4-formylphenylboronic acid was performed with a 300 W Xeon lamp. Femtosecond to Nanosecond Transient Absorption Spectroscopy (fs-TA and ns-TA) Experiments. The fs-TA measurements were performed based on a femtosecond Ti:sapphire regenerative amplifier laser system (Coherent, Astrella-Tunable-F-1k) and an fs-TA spectrometer system (Ultrafast Systems, Helios Fire). The detailed description of fs-TA was reported previously<sup>1,2</sup>. In brief, fs-TA spectra were obtained by employing the harmonic 380 nm for the pump pulse and white-light continuum (330–800 nm light) for the probe pulse generated from the 800 nm output of a femtosecond regenerative amplified Ti:sapphire laser system. For the measurements, herein, the sample solution was excited in a 2 mm path-length cuvette. The subnanosecond transient absorption (EOS) experiment utilizes a subnanosecond

pulsed probe light source, a photonic crystal fiber (PCF)-based supercontinuum laser. The pulse duration of this probe determines the time resolution of the spectrometer ( $<1$  ns). In EOS, the pump-probe delay is controlled electronically, and the maximum time window is close to half the repetition period of the pump laser. In our case, the maximum time window is  $400 \mu\text{s}$ . The sample solutions of CP employed in the ns-TA experiments were the same as in the fs-TA. Electron Paramagnetic Resonance (EPR) analysis was carried out on Bruker Magnettech ESR5000 in ESI, Bruker A300 in article.

## Section S2. Synthesis

### 2.1. Synthesis of HL, 1, 2

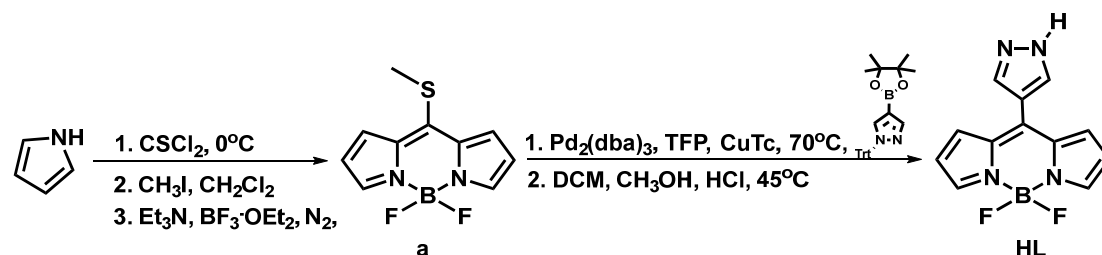

**5,5-difluoro-10-(methylthio)-5H-4(1,5)-dipyrrolo[1,2-c:2',1'-f][1,3,2]diazaborinine (a).** Compound **a** was synthesized according to the reported literatures.<sup>3,4</sup> The  $^1\text{H}$ ,  $^{13}\text{C}$  NMR spectra of **a** were shown in Figs. S1-S2.  $^1\text{H}$  NMR (400 MHz, 298K,  $\text{CDCl}_3$ )  $\delta$  7.80 (s, 2H, CH), 7.42 (d,  $J = 4.2$  Hz, 2H, CH), 6.53 (d,  $J = 3.9$  Hz, 2H, CH), 2.91 (s, 3H,  $\text{CH}_3$ ) ppm.  $^{13}\text{C}$  NMR (100 MHz, 298K,  $\text{CDCl}_3$ )  $\delta$  153.93, 141.33, 127.62, 20.37 ppm.

**5,5-difluoro-10-(1H-pyrazol-4-yl)-5H-4(1,5)-dipyrrolo[1,2-c:2',1'-f][1,3,2]diazaborinine (HL).** **a** (1.05 g, 4.5 mmol), 4-(4,4,5,5-tetramethyl-1,3,2-dioxaborolan-2-yl)-1-trityl-1H-pyrazole (5.89 g, 13.5 mmol),  $\text{Pd}_2(\text{dba})_3$  (1.24 g, 30% mmol), trifurylphosphine (104.48 mg, 10% mmol), Cu(I)-2-thienylcarboxylate (2.15 g, 11.25 mmol) were mixed with 150 mL of THF, and the mixture was added to a dried 350 mL Schlenk flask. The reaction system was heated to reflux and stirred for 72 h under  $\text{N}_2$  atmosphere, the reaction mixture was cooled down to room temperature and filtered and the filtrate was concentrated, followed by the purification of the mixture by silica gel column chromatography ( $\text{CH}_2\text{Cl}_2$ /hexane, 2:1, v/v) to give orange-red solid (1.6 g, 71%). The obtained orange-red solid was dissolved in a mixture of  $\text{CH}_2\text{Cl}_2$ /MeOH (1:1, v/v, 35 mL), into which 5.2 mL of 2 M hydrochloric acid was added. The mixture was heated to  $45^\circ\text{C}$  and stirred for 6 hours. The reaction was monitored by TLC, the pH of the solution was adjusted to about 7 with sodium carbonate solution after the reaction. Followed by the purification of the mixture by silica gel column chromatography (ethyl acetate/hexane, 1:1, v/v) to give red solid (78 mg, 48%). The  $^1\text{H}$ ,  $^{19}\text{F}$ ,  $^{13}\text{C}$  NMR spectra of **HL** were shown in Figs. S3-S5.  $^1\text{H}$  NMR (400 MHz, 298 K,  $\text{DMSO}-d_6$ )  $\delta$  13.81 (s, 1H, NH), 8.58

(s, 1H, CH), 8.12 (s, 1H, CH), 8.03 (s, 2H, CH), 7.42 (d,  $J = 4.5$  Hz, 2H, CH), 6.68 (d,  $J = 4.9$  Hz, 2H, CH) ppm.  $^{19}\text{F}$  NMR (376 MHz, 298 K, DMSO- $d_6$ )  $\delta$  -141.92 – -141.68 (m) ppm.  $^{13}\text{C}$  NMR (100 MHz, 298 K, DMSO- $d_6$ )  $\delta$  143.21, 141.40, 140.08, 133.47, 131.00, 118.88, 114.61 ppm. IR (KBr,  $\text{cm}^{-1}$ ) 3362 (s, N-H), 3128 (w, N-H), 2960 (w, C-H), 1543 (s, C=N), 1476 (m), 1392 (s), 1262 (m), 1124 (s), 1084 (s), 847 (m), 771 (m), 628 (w), 576 (w). Elemental analysis (CHN),  $\text{C}_{12}\text{H}_9\text{BF}_2\text{N}_4$ , calculated (%): C 55.86, H 3.52, N 14.73; found (%): C 55.32, H 3.76, N 21.56.

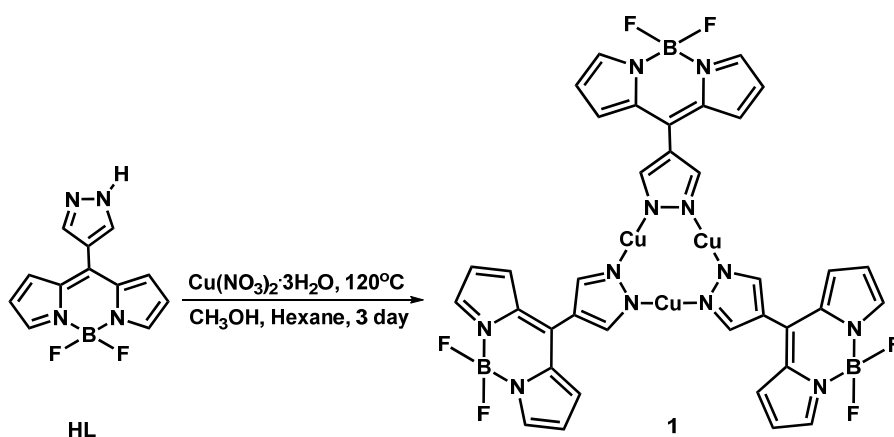

**1.** Ligand **HL** (39 mg, 0.15 mmol) and  $\text{Cu}(\text{NO}_3)_2 \cdot 3\text{H}_2\text{O}$  (39 mg, 0.16 mmol) were dissolved in a solution of MeOH/hexane (2:1, v/v, 3 mL), into which 20  $\mu\text{L}$  pyridine was added. The mixture was sealed in a Pyrex tube and kept in an oven at 120  $^\circ\text{C}$  for 72 h. Slowly cooling to room temperature gave complex **1** as dark red block crystals. Yield: 35%. The  $^1\text{H}$ ,  $^{19}\text{F}$ ,  $^{13}\text{C}$  NMR spectra of **1** were shown in Figs. S4-S6.  $^1\text{H}$  NMR (400 MHz, 298 K, DMSO- $d_6$ )  $\delta$  8.36 (d,  $J = 9.7$  Hz, 1H, CH), 8.00 (s, 1H, CH), 7.42 (s, 1H, CH), 6.69 (s, 1H, CH) ppm.  $^{19}\text{F}$  NMR (376 MHz, 298 K, DMSO- $d_6$ )  $\delta$  -141.65 – -141.86 (m) ppm.  $^{13}\text{C}$  NMR (100 MHz, 298 K, DMSO- $d_6$ )  $\delta$  143.58, 142.36, 140.35, 133.27, 130.06, 118.61, 114.31 ppm. IR (KBr,  $\text{cm}^{-1}$ ) 3445(w, N-H), 3120 (w, N-H), 2968 (w, C-H), 1545 (s, C=N), 1468 (m), 1393 (s), 1266 (m), 1124 (m), 1081 (s), 851 (m), 772 (m), 664 (m), 578 (w). Elemental analysis (CHN),  $\text{C}_{36}\text{H}_{24}\text{B}_3\text{Cu}_3\text{F}_6\text{N}_{12}(\text{H}_2\text{O})_3$ , calculated (%): C 42.57, H 2.98, N 16.55; found (%): C 42.83, H 2.46, N 16.08.

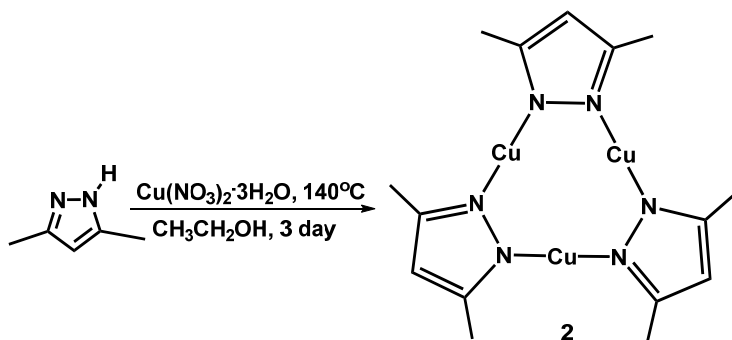

**2.** Complex **2** was prepared according to reported literature procedures with slight modification.<sup>5, 6</sup> Ligand 3,5-dimethylpyrazole (96 mg, 1.0 mmol) and  $\text{Cu}(\text{NO}_3)_2 \cdot 3\text{H}_2\text{O}$  (120.8 mg, 0.5 mmol) were dissolved in a mixture of EtOH/Chlorobenzene (2:1 v/v, 3 mL). The mixture was sealed in a Pyrex tube and kept in an oven at 140 °C for 72 h. Slowly cooling to room temperature gave complex **2** as yellowish block crystals. Yield: 65%. IR (KBr,  $\text{cm}^{-1}$ ) 2961 (w, C-H), 1524 (s, C=N), 1421 (m), 1345 (m), 1148 (m), 1058 (m), 768 (s), 651 (w), 593 (w). Elemental analysis (CHN),  $\text{C}_{15}\text{H}_{21}\text{Cu}_3\text{N}_6$ , calculated (%): C 37.85, H 4.45, N 17.66; found (%): C 37.40, H 4.35, N 17.52.

## 2.2. PMMA film fabrication of **HL**, **1**, **2**

Sample (0.002 mmol) and 100 mg polymethyl methacrylate (PMMA) are dissolved in a mixed solution of dimethyl sulfoxide (DMSO) and  $\text{CH}_2\text{Cl}_2$  (1:4, v/v, 5 mL), and then they are applied to a glass plate and air-dried to form a film.

## Section S3. Supplementary Figures

### 3.1. NMR spectroscopy

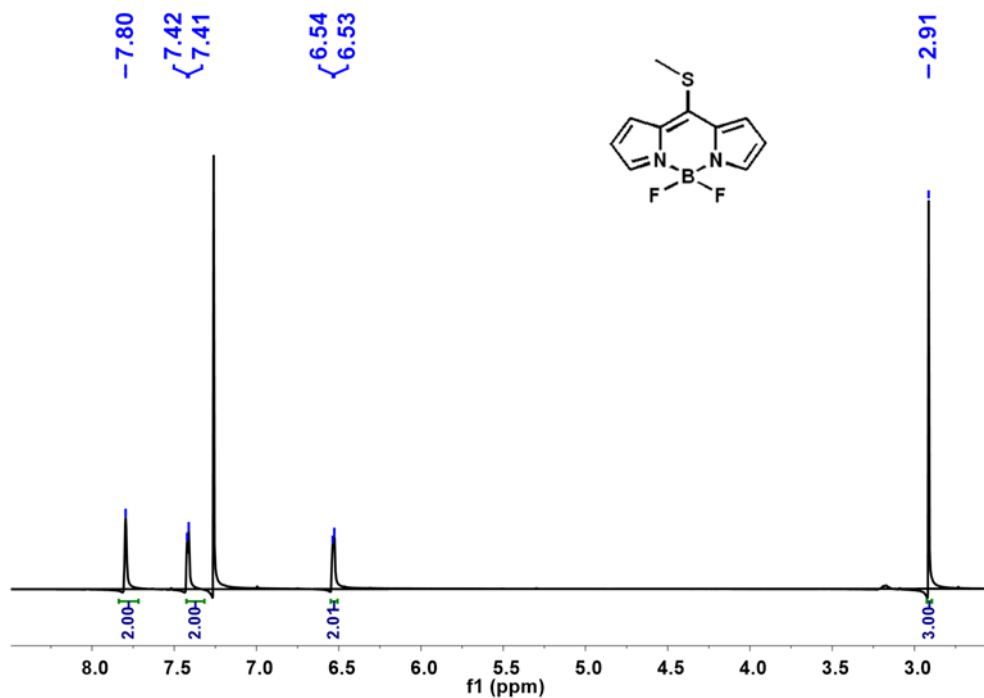

**Fig. S1.**  $^1\text{H}$  NMR spectrum (400 MHz, 298 K,  $\text{DMSO-d}_6$ ) of **a**.

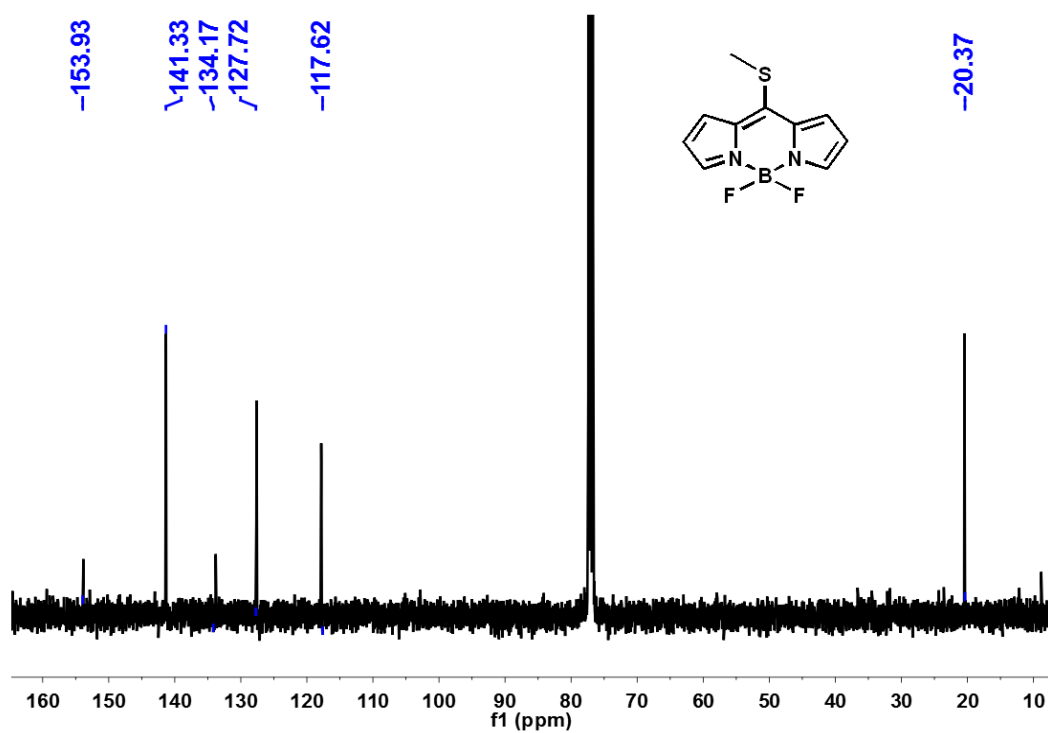

**Fig. S2.**  $^{13}\text{C}$  NMR spectrum (100 MHz, 298 K,  $\text{DMSO-d}_6$ ) of **a**.



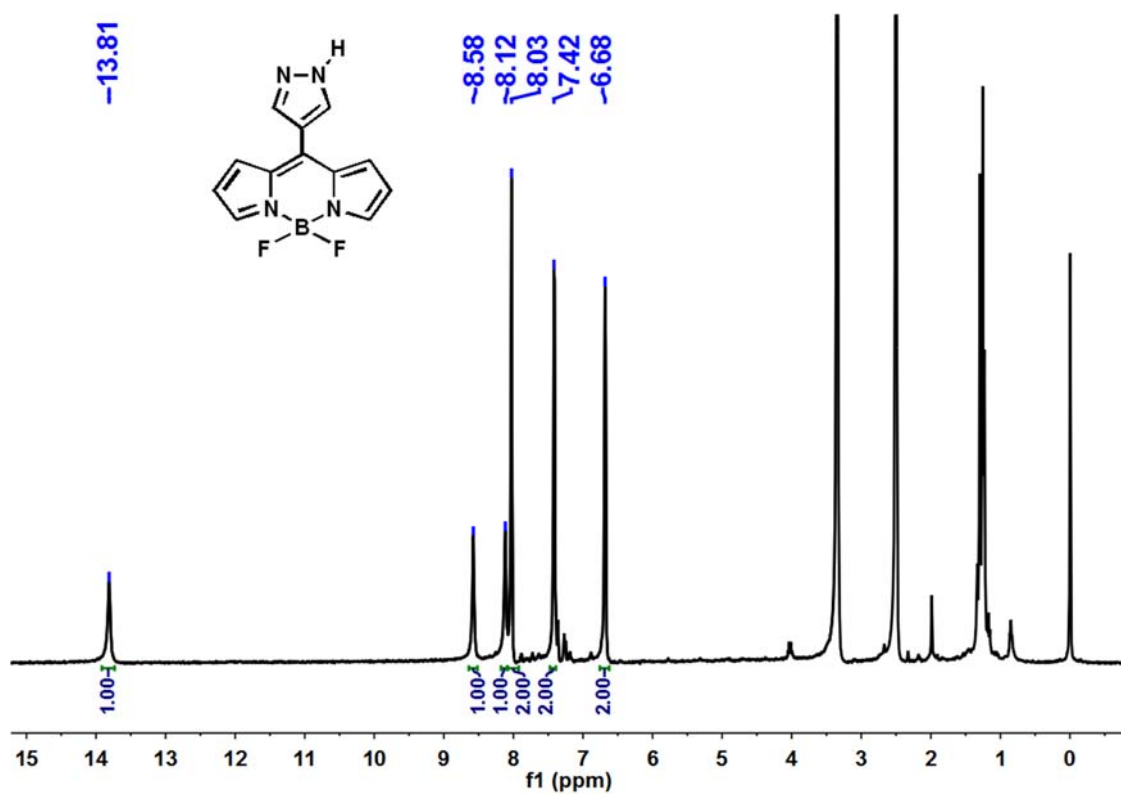

Fig. S3. <sup>1</sup>H NMR spectrum (400 MHz, 298 K, DMSO-d<sub>6</sub>) of HL.

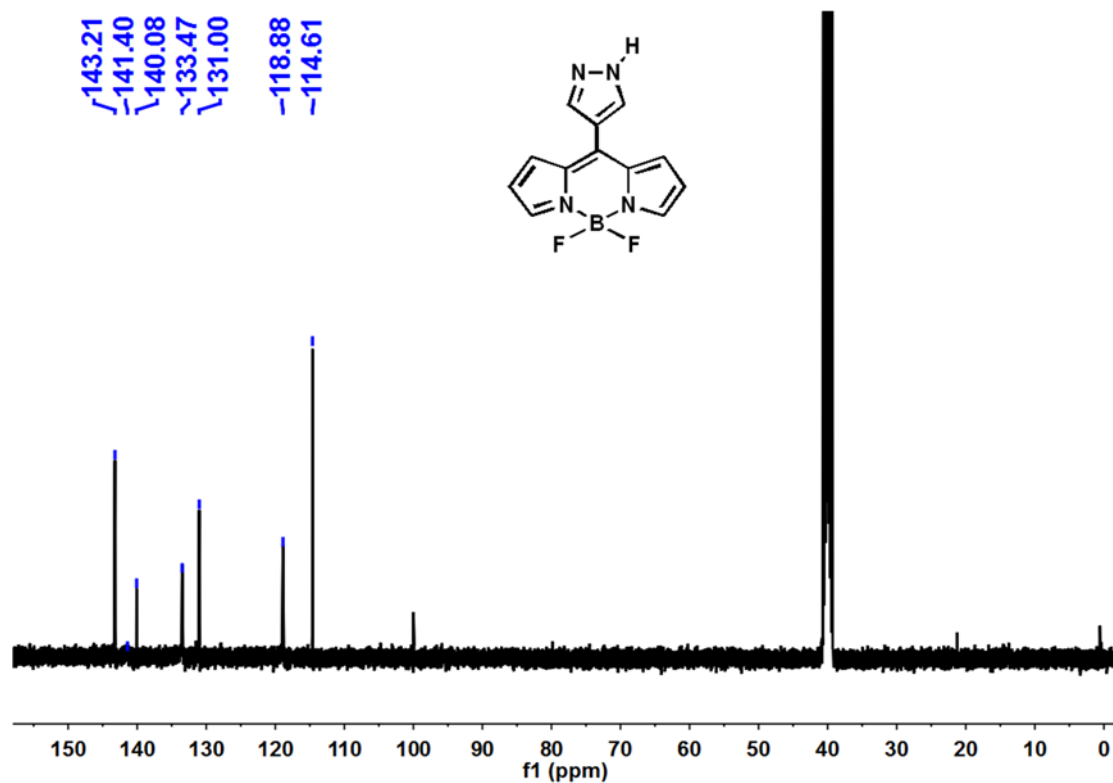

Fig. S4. <sup>13</sup>C NMR spectrum (100 MHz, 298 K, DMSO-d<sub>6</sub>) of HL.

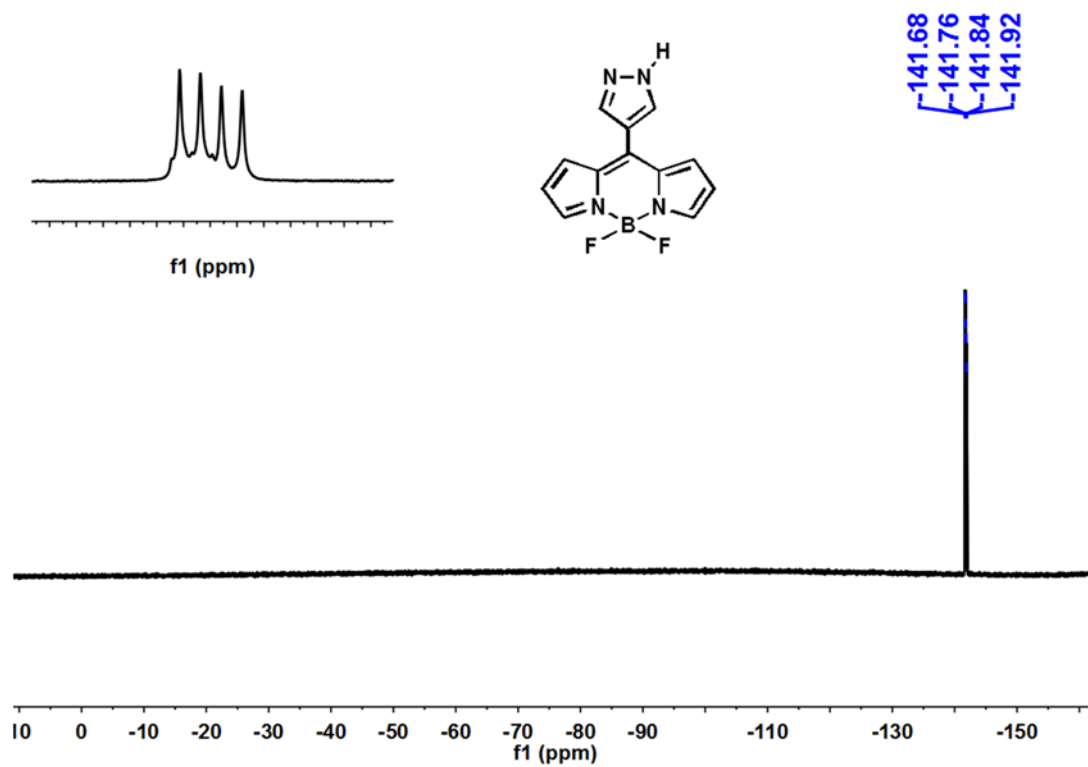

Fig. S5.  $^{19}\text{F}$  NMR spectrum (376 MHz, 298 K,  $\text{DMSO-d}_6$ ) of **HL**.

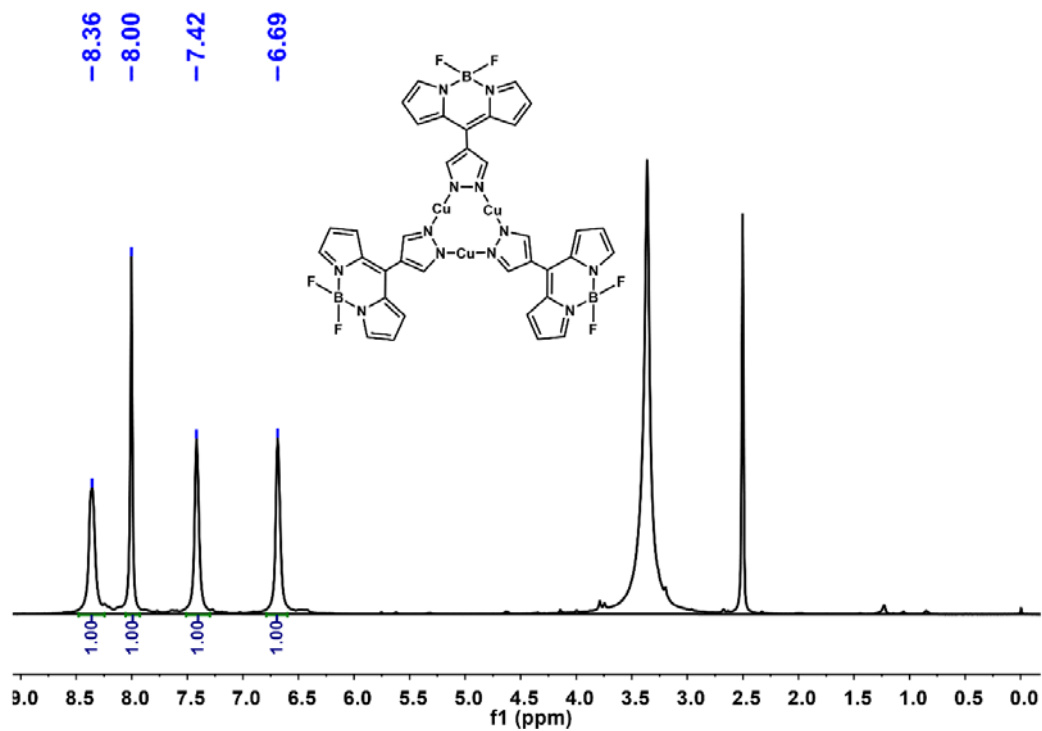

Fig. S6.  $^1\text{H}$  NMR spectrum (400 MHz, 298 K,  $\text{DMSO-d}_6$ ) of **1**.

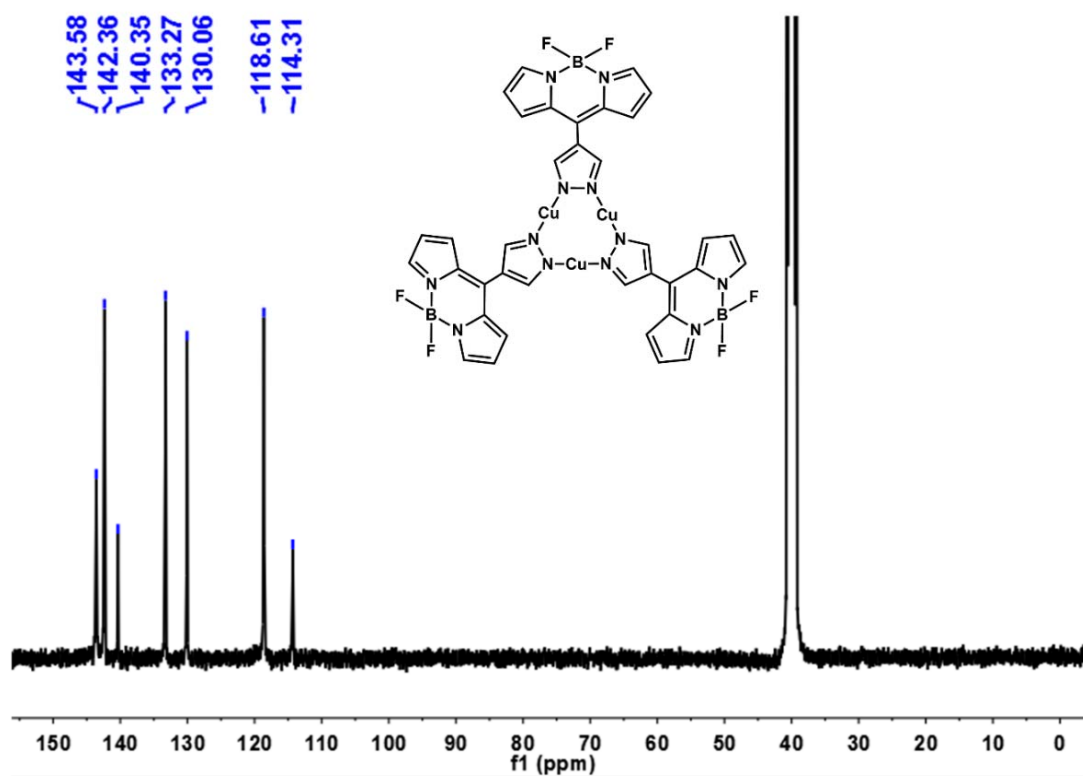

**Fig. S7.**  $^{13}\text{C}$  NMR spectrum (100 MHz, 298 K, DMSO- $d_6$ ) of **1**.

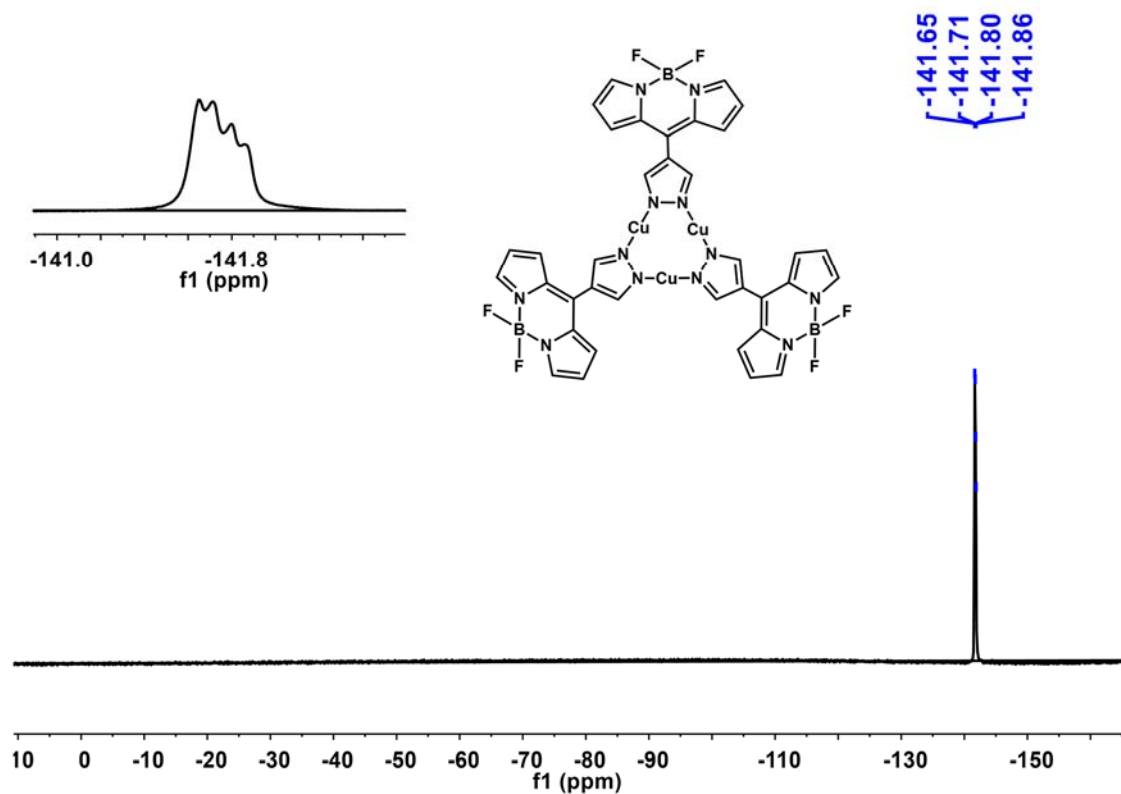

**Fig. S8.**  $^{19}\text{F}$  NMR spectrum (376 MHz, 298 K, DMSO- $d_6$ ) of **1**.

### 3.2. Cyclic Voltammetry (CV)

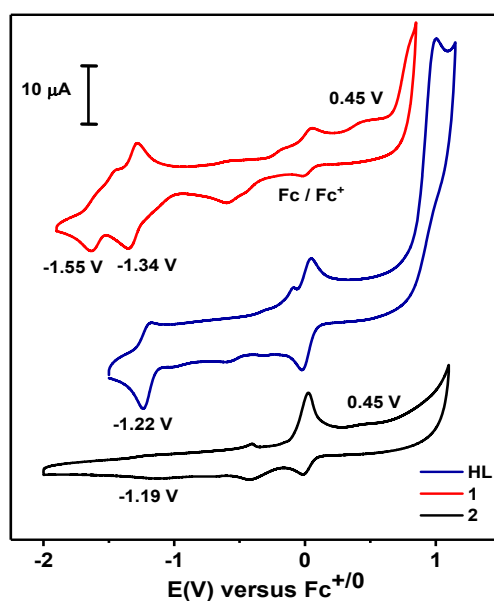

**Fig. S9.** CV curves of **HL**, **1**, and **2**. The experiments were carried out in deaerated DMF solution, containing 0.5 mM of **HL**, **1**, or **2**, 0.2 mM ferrocene, and 0.10 M Bu<sub>4</sub>NPF<sub>6</sub> as the supporting electrolyte, with a scan rate of 0.05 V/s<sup>-1</sup> and a negative initial scan direction. Glassy carbon electrode, Ag/AgNO<sub>3</sub>, and Pt silk were used as the working electrode, reference electrode, and counter electrode, respectively.

### 3.3. X-ray Photoelectron Spectroscopy (XPS)

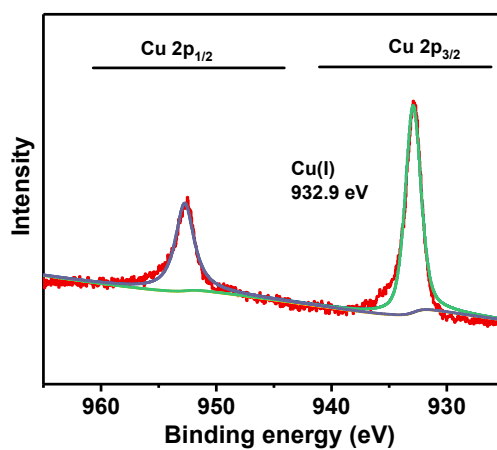

**Fig. S10.** XPS of **1**.

### 3.4. Single-crystal structure

Suitable single crystals of **1** and **2** were mounted with nylon loops. Data was collected on an Oxford Diffraction XtalAB [Rigaku(Cu) Xray dual wavelength source,  $K\alpha$ ,  $\lambda = 1.5418 \text{ \AA}$ ] equipped with a monochromator and CCD plate detector (CrysAlisPro CCD, Oxford Diffraction Ltd) at 100 K. Single-crystal structures of compounds **1** and **2** were solved by direct methods by ShelXS<sup>7</sup> in Olex2 1.3<sup>8</sup>. All non-hydrogen atoms were refined with anisotropic thermal parameters, and all hydrogen atoms were included in calculated positions and refined with isotropic thermal parameters riding on those of the parent atoms. Crystal data and structure refinement parameters were summarized in Table S1.

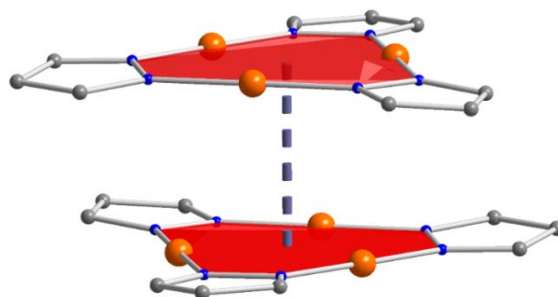

**Fig. S11.** The dimer of **1** in the crystal and the dash line refers to the distance between the  $\text{Cu}_3\text{N}_6$  planes ( $3.214 \text{ \AA}$ ). Hydrogen atoms and BODIPY units were omitted for clarity. Color code: Cu, orange; N, blue; C, gray.

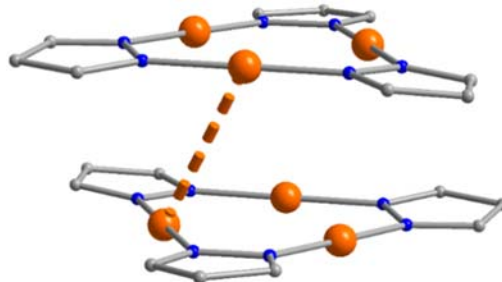

**Fig. S12.** Stacked diagram of two molecules for **1**, and the distance between  $\text{Cu}\cdots\text{Cu}$  is  $3.734 \text{ \AA}$ . Hydrogen atoms and BODIPY units were omitted for clarity. Color code: Cu, orange; N, blue; C, gray.

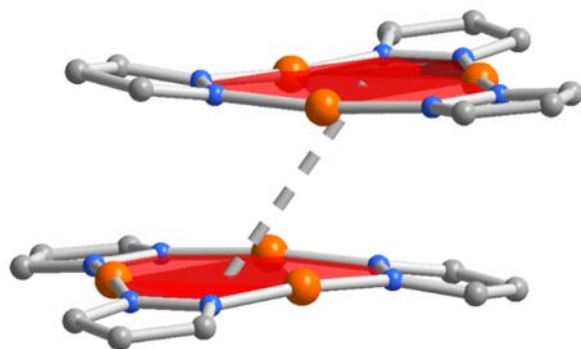

**Fig. S13.** The dimer of **2** in the crystal and the dash line refers to the distance between the  $\text{Cu}_3\text{N}_6$  planes ( $3.745 \text{ \AA}$ ). Hydrogen atoms and methyl substituents were omitted for clarity. Color code: Cu, orange; N, blue; C, gray.

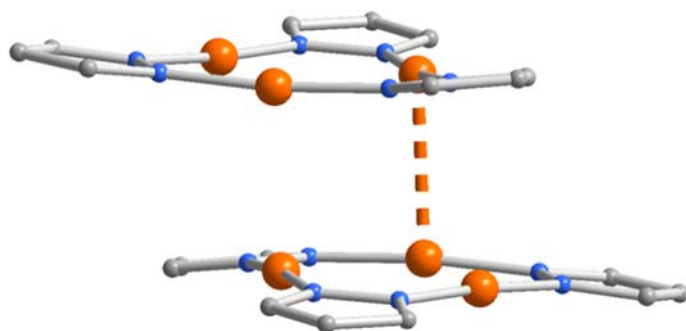

**Fig. S14.** Stacked diagram of two molecules for **2**, and the distance between  $\text{Cu}\cdots\text{Cu}$  is  $2.887 \text{ \AA}$ . Hydrogen atoms and methyl substituents were omitted for clarity. Color code: Cu, orange; N, blue; C, gray.

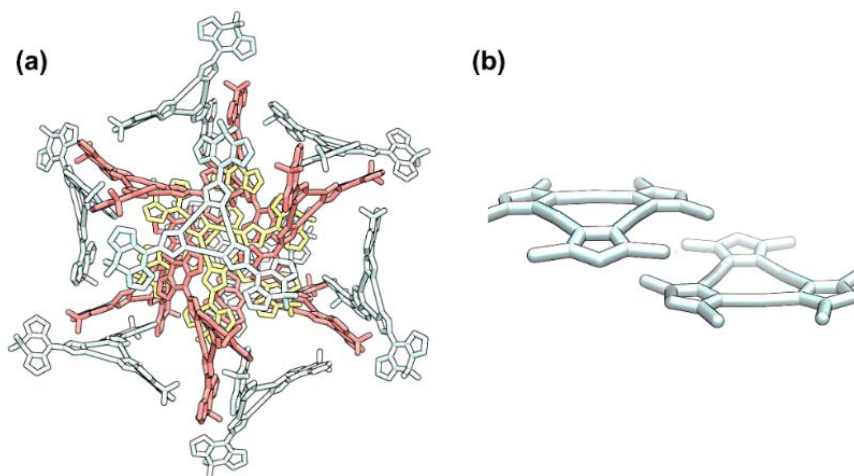

**Fig. S15.** Crystal packing in one unit cell. (a) **1**; (b) **2**.

**Table S1.** Crystal data and structure refinement parameters of **1** and **2**.

| Parameter                                                       | <b>1</b>                                                                                      | <b>2</b>                                                                       |
|-----------------------------------------------------------------|-----------------------------------------------------------------------------------------------|--------------------------------------------------------------------------------|
| Empirical formula                                               | C <sub>36</sub> H <sub>24</sub> B <sub>3</sub> Cu <sub>3</sub> F <sub>6</sub> N <sub>12</sub> | C <sub>15</sub> H <sub>21</sub> Cu <sub>3</sub> N <sub>6</sub>                 |
| Formula weight                                                  | 961.72                                                                                        | 476.00                                                                         |
| Temperature/K                                                   | 99.97                                                                                         | 100.00                                                                         |
| Crystal system                                                  | cubic                                                                                         | triclinic                                                                      |
| Space group                                                     | <i>Ia-3</i>                                                                                   | <i>P-1</i>                                                                     |
| a/Å                                                             | 24.8754(2)                                                                                    | 8.4090(3)                                                                      |
| b/Å                                                             | 24.8754(2)                                                                                    | 10.1687(4)                                                                     |
| c/Å                                                             | 24.8754(2)                                                                                    | 11.3477(4)                                                                     |
| $\alpha$ /°                                                     | 90.000                                                                                        | 70.031(3)                                                                      |
| $\beta$ /°                                                      | 90.000                                                                                        | 75.972(3)                                                                      |
| $\gamma$ /°                                                     | 90.000                                                                                        | 82.051(3)                                                                      |
| Volume/Å <sup>3</sup>                                           | 15392.5(4)                                                                                    | 883.15(6)                                                                      |
| Z                                                               | 16                                                                                            | 2                                                                              |
| $\rho_{\text{calc}}/\text{cm}^3$                                | 1.660                                                                                         | 1.790                                                                          |
| $\mu/\text{mm}^{-1}$                                            | 2.583                                                                                         | 4.260                                                                          |
| F(000)                                                          | 7680                                                                                          | 480                                                                            |
| 2 $\theta$ range for data collection/°                          | 4.3310 to 74.3740                                                                             | 4.239 to 78.358                                                                |
| Index ranges                                                    | -30 ≤ h ≤ 15<br>-20 ≤ k ≤ 28<br>-23 ≤ l ≤ 27                                                  | -10 ≤ h ≤ 10<br>-12 ≤ k ≤ 12<br>-14 ≤ l ≤ 14                                   |
| Reflections collected                                           | 9120                                                                                          | 7777                                                                           |
| Independent reflections                                         | 2643 [ <i>R</i> <sub>int</sub> = 0.0217,<br><i>R</i> <sub>sigma</sub> = 0.060]                | 3599 [ <i>R</i> <sub>int</sub> = 0.0433,<br><i>R</i> <sub>sigma</sub> = 0.172] |
| Data/restraints/parameters                                      | 2643 / 0 / 181                                                                                | 3599 / 0 / 223                                                                 |
| Largest diff. peak and hole<br>(e/Å <sup>3</sup> )              | 0.369, -0.333                                                                                 | 0.989, -1.122                                                                  |
| Goodness-of-fit on F <sup>2</sup>                               | 1.076                                                                                         | 1.116                                                                          |
| <i>R</i> <sub>1</sub> <sup>a</sup> [ <i>I</i> ≥ 2σ( <i>I</i> )] | 0.0431                                                                                        | 0.0586                                                                         |
| <i>wR</i> <sub>2</sub> <sup>b</sup> (all data)                  | 0.1241                                                                                        | 0.1727                                                                         |
| CCDC Nos.                                                       | 2072182                                                                                       | 2133483                                                                        |

$$^a R_1 = \sum(|F_o| - |F_c|) / \sum F_o; \quad ^b wR_2 = [\sum w(F_o^2 - F_c^2)^2 / \sum w(F_o^2)^2]^{1/2}$$

### 3.5. Thermogravimetric Analysis (TGA)

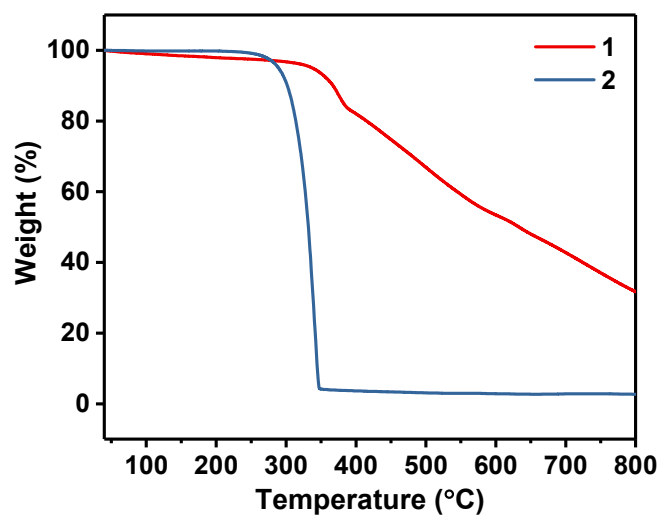

**Fig. S16.** TGA profiles of **1** and **2** under N<sub>2</sub> atmosphere.

### 3.6. Fourier Transform Infrared (FT-IR) Spectra

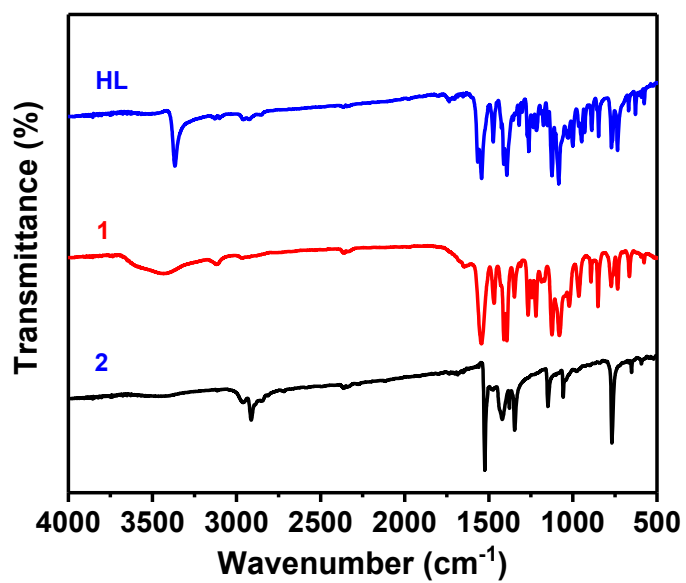

**Fig. S17.** FT-IR spectra of **HL**, **1**, and **2**.



### 3.7. Power X-ray Diffraction (PXRD)

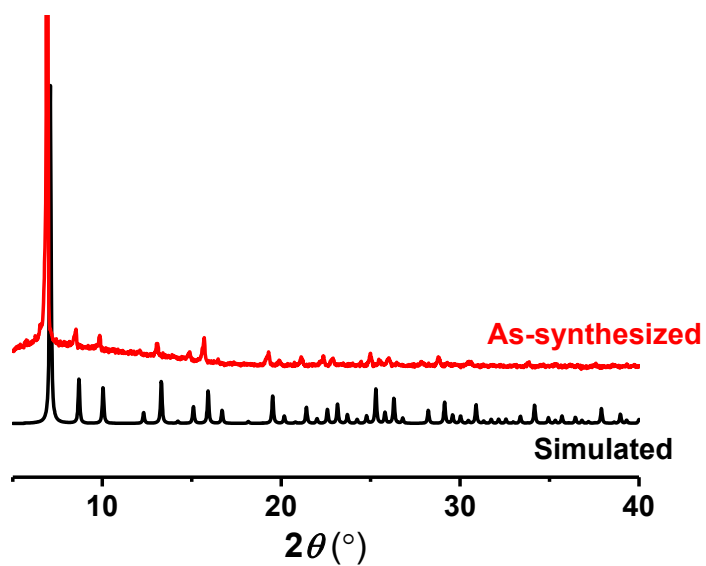

**Fig. S18.** The comparison of simulated and as-synthesized PXRD patterns of **1**.

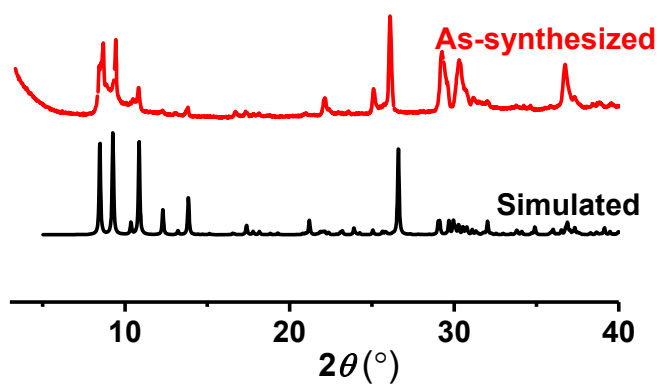

**Fig. S19.** The comparison of simulated and as-synthesized PXRD patterns of **2**.

### 3.8. Solution-state UV-Vis Absorption Spectra

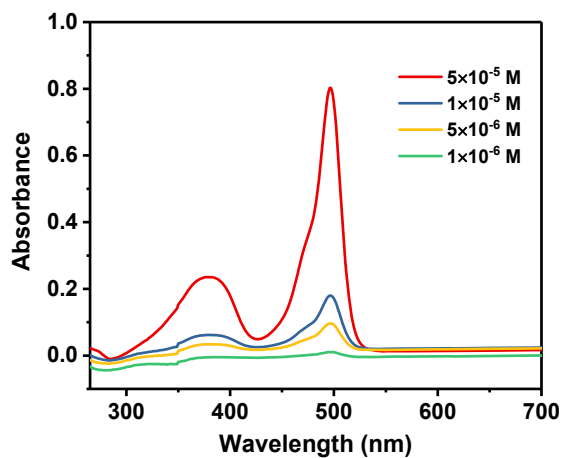

Fig. S20. UV-Vis absorption spectra of **HL** in DMSO.

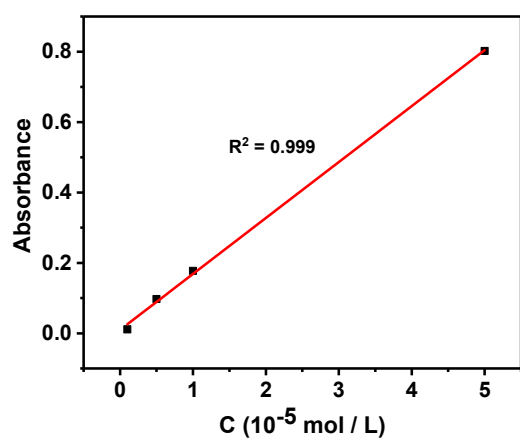

Fig. S21. Absorbance-concentration fitting curve of **HL**,  $R^2 = 0.999$ .

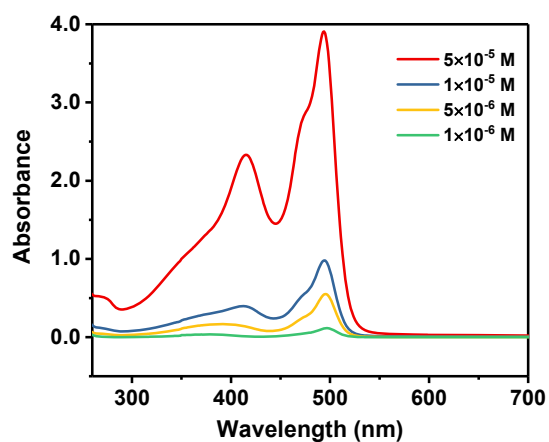

Fig. S22. UV-Vis absorption spectra of **1** in DMSO.

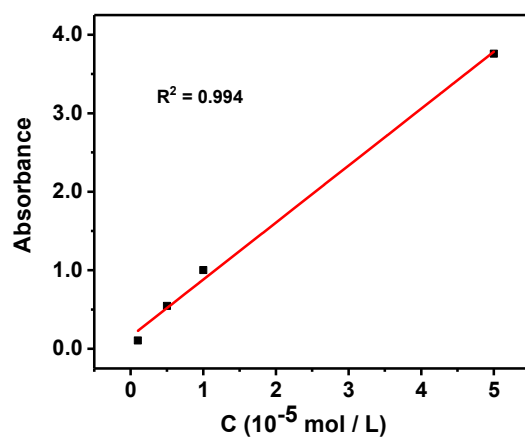

Fig. S23. Absorbance-concentration fitting curve of **1**.  $R^2 = 0.994$ .

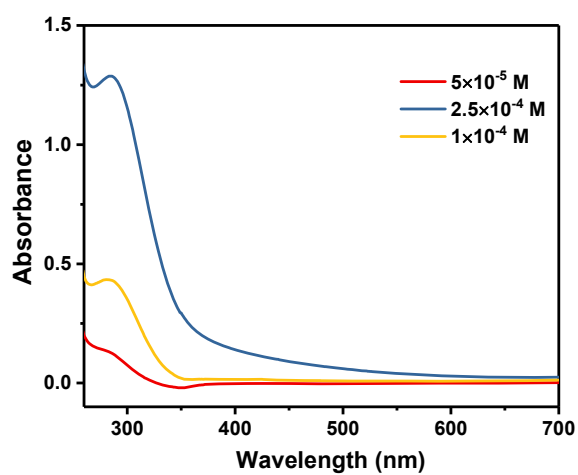

Fig. S24. UV-Vis absorption spectra of **2** in DMSO.

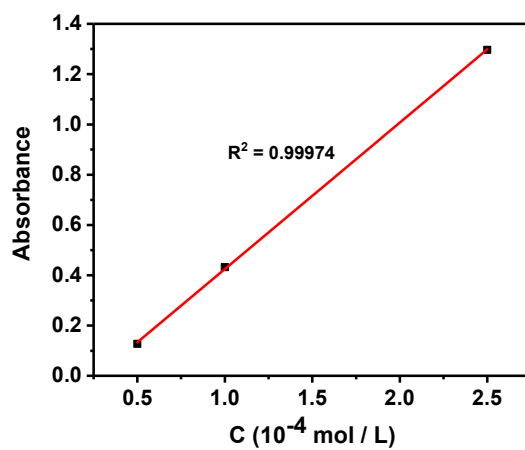

Fig. S25. Absorbance-concentration fitting curve of **2**.  $R^2 = 0.999$ .

### 3.9. Solution-state Photoluminescence Spectra

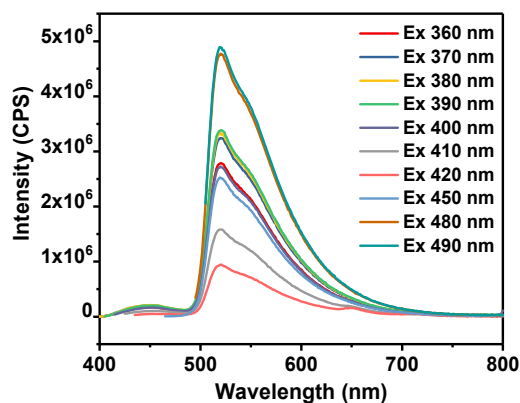

**Fig. S26.** The room-temperature emission spectra of **1** in DMSO ( $1 \times 10^{-5}$  M) under different excitation wavelengths.

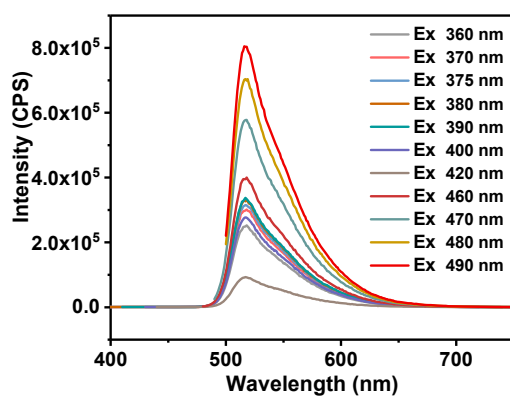

**Fig. S27.** The room-temperature emission spectra of **HL** in DMSO ( $1 \times 10^{-5}$  M) under different excitation wavelengths.

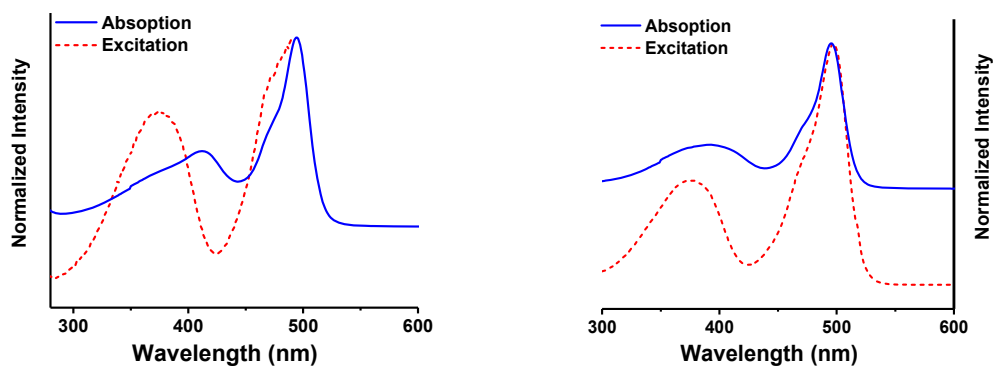

**Fig. S28.** Comparison of normalized UV-vis absorption and excitation spectra of complex **1** at different concentrations,  $1 \times 10^{-5}$  M (left);  $5 \times 10^{-6}$  M (right).

### 3.10. Room-Temperature Photoluminescence Lifetime

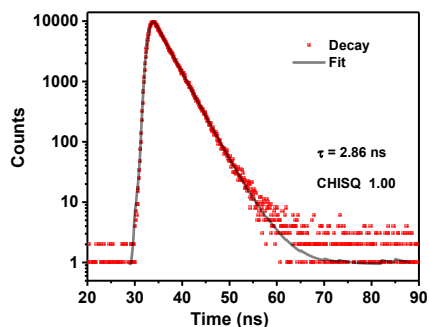

**Fig. S29.** Photoluminescence decay of **HL** ( $C = 1 \times 10^{-5}$  M) obtained via time-correlated single photon counting (red), and the black line represents a dual-exponential fit of the data.

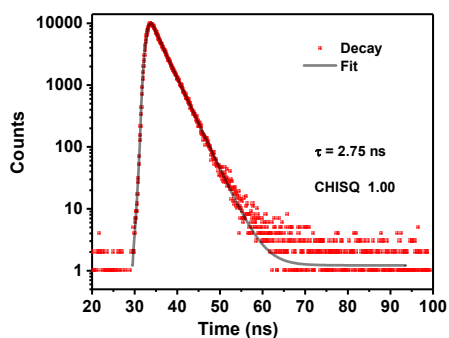

**Fig. S30.** Photoluminescence decay of **1** ( $C = 1 \times 10^{-5}$  M) obtained via time-correlated single photon counting (red), and the black line represents a dual-exponential fit of the data.

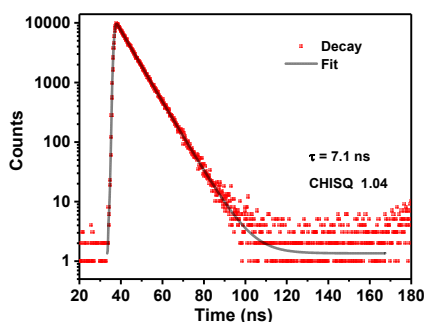

**Fig. S31.** Photoluminescence decay of **HL** at film-state obtained via time-correlated single photon counting (red), and the black line represents a dual-exponential fit of the data.

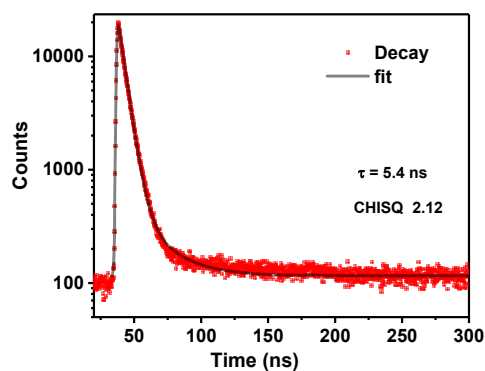

**Fig. S32.** Photoluminescence decay of **1** at film-state obtained via time-correlated single photon counting (red), and the black line represents a dual-exponential fit of the data.

### 3.11. Film-state Photoluminescence Spectra

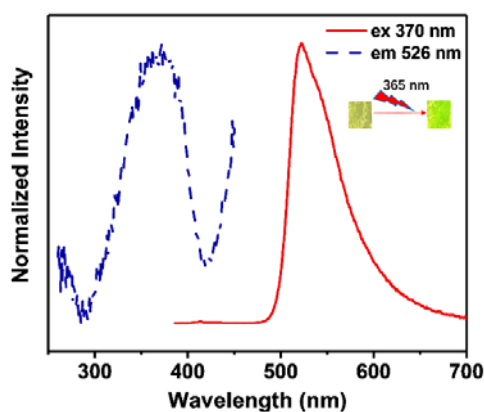

**Fig. S33.** Comparison of normalized emission and excitation spectrum of **HL**.

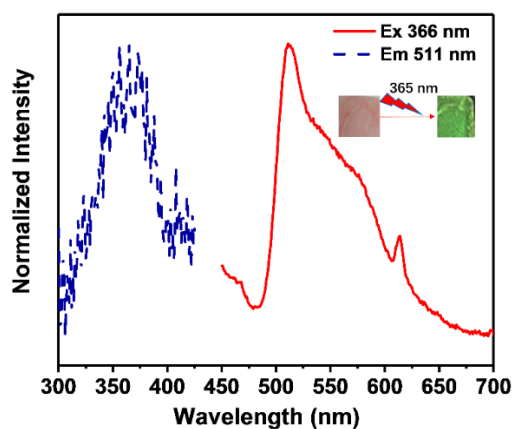

**Fig. S34.** Comparison of normalized emission and excitation spectrum of **1**.

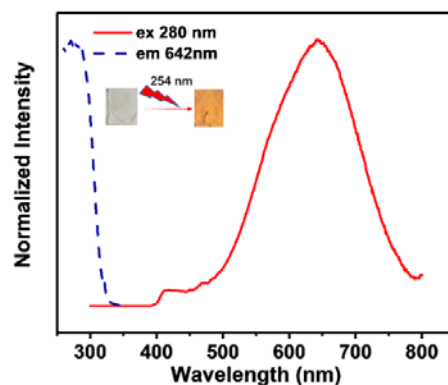

**Fig. S35.** Comparison of normalized emission and excitation spectrum of **2**.

**Table S2.** Summary of photophysical parameters for the compounds in the film state

| complexes | $\lambda_{\text{ex}}$ | $\lambda_{\text{em}}$ | $\Phi_{\text{F}}$ (%) <sup>a</sup> | $\tau_{\text{F}}$ (ns) <sup>d</sup> | $\tau_{\text{T}}$ ( $\mu\text{s}$ ) <sup>g</sup> |
|-----------|-----------------------|-----------------------|------------------------------------|-------------------------------------|--------------------------------------------------|
| <b>HL</b> | 370                   | 526                   | 91.9 <sup>b</sup>                  | 7.1 <sup>e</sup>                    | 0.6 <sup>h</sup>                                 |
| <b>1</b>  | 366                   | 511                   | 2.9 <sup>b</sup>                   | 5.4 <sup>e</sup>                    | 1.0 <sup>h</sup>                                 |
| <b>2</b>  | 280                   | 642                   | 100 <sup>c</sup>                   | 1.9 <sup>f</sup>                    | 19 <sup>i</sup>                                  |

<sup>a</sup> Fluorescence quantum yields. <sup>b</sup>  $\lambda_{\text{ex}} = 370$  nm. <sup>c</sup>  $\lambda_{\text{ex}} = 280$  nm. <sup>d</sup> The average fluorescence decay lifetime. <sup>e</sup>  $\lambda_{\text{ex}} = 370$  nm. <sup>f</sup>  $\lambda_{\text{ex}} = 320$  nm. <sup>g</sup> The average phosphorescence decay lifetime. <sup>h</sup>  $\lambda_{\text{ex}} = 370$  nm. <sup>i</sup>  $\lambda_{\text{ex}} = 340$  nm.

### 3.12. Transient Absorption Spectra (TAs)

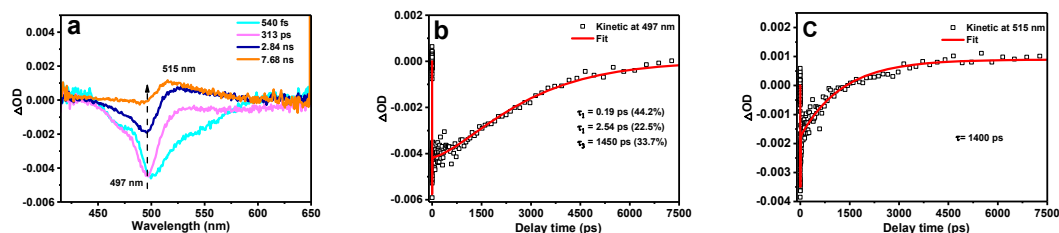

**Fig. S36.** Femtosecond transient absorption spectra of (a) **HL**; (b) The decay of **HL** at 497 nm; c) The decay of **HL** at 516 nm,  $C = 1 \times 10^{-5}$  M in DMSO solution after pulsed excitation at 380 nm.

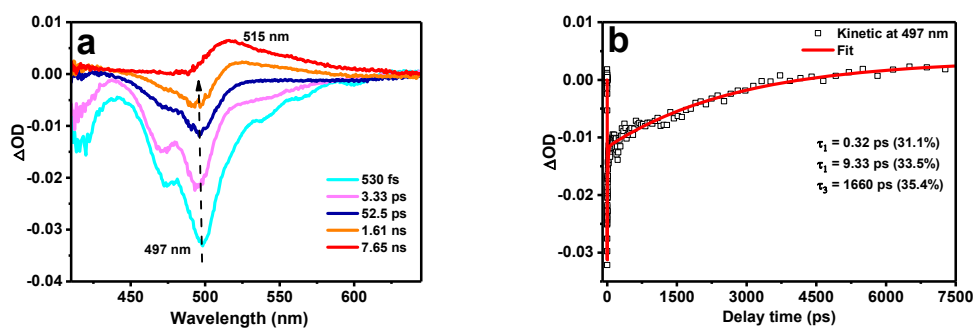

**Fig. S37.** Femtosecond transient absorption spectra of (a) **1**; (b) The decay of **1** at 497 nm,  $C = 1 \times 10^{-5}$  M in DMSO solution after pulsed excitation at 380 nm.

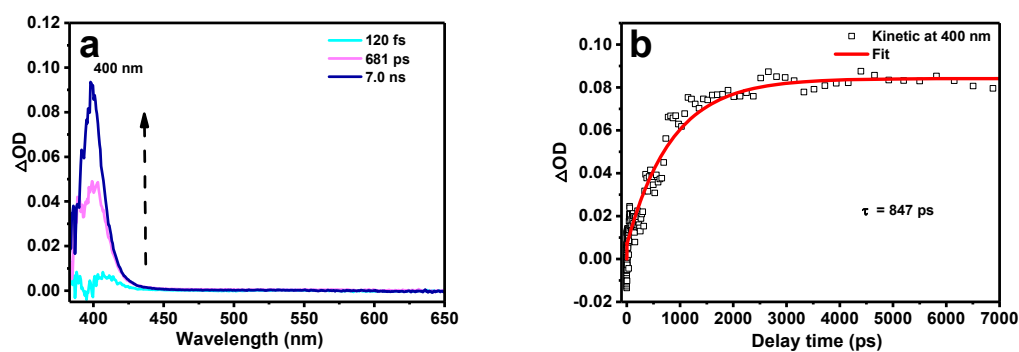

**Fig. S38.** Femtosecond transient absorption spectra of (a) **2**; (b) the decay of **2** at 400 nm,  $C = 1 \times 10^{-5}$  M in DMSO solution after pulsed excitation at 380 nm.



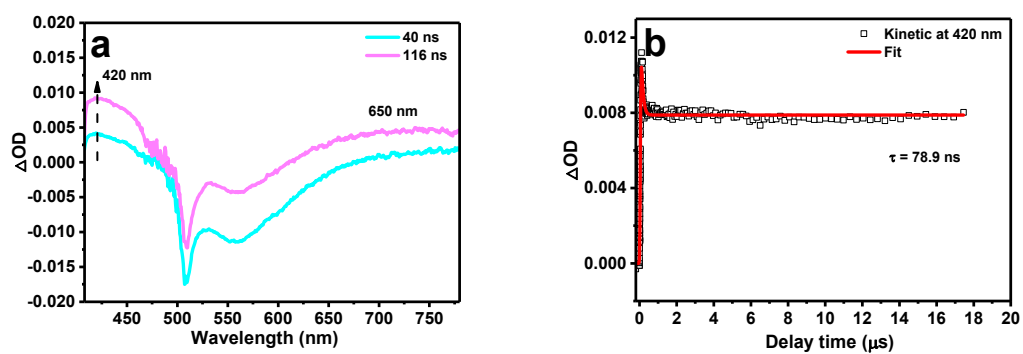

**Fig. S39.** Nanosecond transient absorption spectra of (a) **HL**; (b) the decay of **HL** at 420 nm,  $C = 1 \times 10^{-5}$  M in deaerated DMSO solution after pulsed excitation at 400 nm.

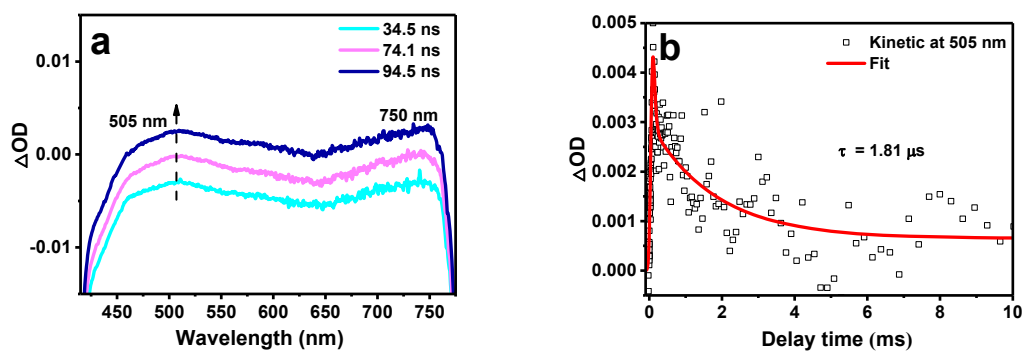

**Fig. S40.** Nanosecond transient absorption spectra of (a) **2**; (b) the decay of **2** at 505 nm,  $C = 1 \times 10^{-5}$  M in deaerated DMSO solution after pulsed excitation at 400 nm.

### 3.13. Computational Details

Density functional theory (DFT) as well as time-dependent density functional theory (TDDFT) computations were performed for ligand **HL** and complexes **1** and **2** by using Gaussian 09 software.<sup>9</sup> The following level of theory was adopted in all the calculations: (1) Functional: the hybrid Perdew, Burke, and Ernzerhof functional (PBE0)<sup>10, 11</sup> in conjunction with D3(BJ) dispersion correlation;<sup>12, 13</sup> (2) Basis sets: the LANL2DZ<sup>14-17</sup> effective core potential (ECP) was used for Cu and the 6-31G(d,p)<sup>18</sup> basis set was used for the other atoms; (3) the solvent effect of DMSO was considered by using solvation model density (SMD).<sup>19</sup> Firstly, the geometrical optimization was performed for the monomers of all the above compounds to obtain their stable ground-state ( $S_0$ ) geometries by restricted PBE0 method, confirmed by the absence of imaginary frequencies (NIMG = 0). Then, the first 50 singlet-singlet spin-allowed transitions and the first 10 singlet-triplet spin-forbidden transitions were calculated based on the optimized  $S_0$  structures. By using Multiwfn program,<sup>20</sup> the TDDFT results were extracted from the Gaussian output files (log files), and the cub files for drawing the electron density differences (EDD) maps were obtained by the hole-electron analysis function<sup>21</sup> of Multiwfn software after inputting the logfiles and the formatted checkpoint (fchk) files. Note that before comparing the experimental and simulated UV-vis absorption spectra of **HL** and complexes **1** and **2**, the simulated wavelengths were multiplied by 1.2, since 1.2 is the result of experiment absorption maximum (497.0 nm) / simulated absorption maximum (410.8 nm) of **HL**. Besides, the cub files for drawing the contours of molecular orbitals of complex **1** and **2** were obtained by Multiwfn software after inputting the fchk files of TDDFT. The stable geometries of the first triplet state ( $T_1$ ) for all the above three compounds were obtained by unrestricted PBE0 method. Spin density surfaces of  $T_1$  states were drawn using the cub files generated by Multiwfn program. For complex **1**, the geometrical optimization and the calculations of the first singlet and triplet excited ( $S_1$  and  $T_1$ ) states were also carried out based on the dimer model extracted from the corresponding X-ray single-crystal data.

**Table S3** The comparison of selected structural parameters between the geometries of  $S_0$  and  $T_1$  states of the monomers of ligand **HL** and complexes **1** and **2** optimized at PBE0-D3(BJ) level

|           | Torsion Angle ( $^\circ$ ) <sup>a</sup> |                  | $d_{\text{Cu-Cu}}$ ( $\text{\AA}$ ) <sup>b</sup> |                     |
|-----------|-----------------------------------------|------------------|--------------------------------------------------|---------------------|
|           | $S_0$                                   | $T_1$            | $S_0$                                            | $T_1$               |
| <b>HL</b> | 39.2                                    | 42.3             | -                                                | -                   |
| <b>1</b>  | 37.8, 38.1, 38.3                        | 37.6, 38.2, 42.6 | 3.216, 3.234, 3.234                              | 3.221, 3.228, 3.228 |
| <b>2</b>  | -                                       | -                | 3.204, 3.240, 3.240                              | 2.707, 2.861, 2.862 |

<sup>a</sup> The torsion angles between a BODIPY ring and a pyrazolyl ring. <sup>b</sup> The intermolecular Cu-Cu distances.

**Table S4.** The selected singlet-singlet spin-allowed transitions of **HL** in DMSO at PBE0-D3(BJ)/6-31G(d,p) level<sup>a</sup>

| No. | E(eV) | $\lambda(\text{nm})^b$ | $f^c$  | EDD map <sup>d</sup>                                                                 |
|-----|-------|------------------------|--------|--------------------------------------------------------------------------------------|
| 1   | 3.018 | 410.8 (493.0)          | 0.4905 | 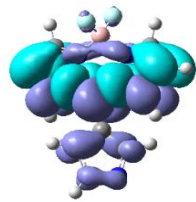 |
| 2   | 3.568 | 347.5 (417.0)          | 0.2574 |  |
| 3   | 3.681 | 336.8 (404.2)          | 0.1076 |  |
| 4   | 3.912 | 316.9 (380.3)          | 0.0815 |  |

|    |       |               |        |                                                                                    |
|----|-------|---------------|--------|------------------------------------------------------------------------------------|
| 5  | 4.134 | 299.9 (359.9) | 0.0197 | 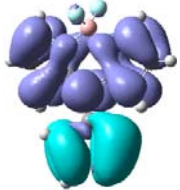 |
| 6  | 4.971 | 249.4 (299.3) | 0.0300 |  |
| 10 | 6.429 | 192.9 (231.4) | 0.0131 |  |

<sup>a</sup> Only the TDDFT results of S<sub>1</sub> state and the S<sub>n</sub> states with f larger than 0.01 among the first 10 S<sub>n</sub> states were given. <sup>b</sup> The wavelengths multiplied by 1.2 were given in parentheses. <sup>c</sup> Oscillator strength. <sup>d</sup> Isovalue = 5×10<sup>-4</sup> a.u. The electrons transfer from the blue regions to the purple regions during the excitation from S<sub>0</sub> state to S<sub>n</sub> state.

**Table S5.** The selected singlet-triplet spin-forbidden transitions of **HL** in DMSO at PBE0-D3(BJ)/6-31G(d,p) level<sup>a</sup>

| No. | E(eV) | $\lambda$ (nm) | EDD map <sup>b</sup>                                                                 |
|-----|-------|----------------|--------------------------------------------------------------------------------------|
| 1   | 1.680 | 738.0          | 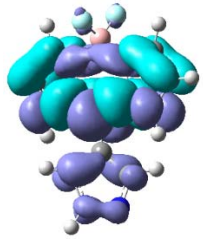   |
| 2   | 2.738 | 452.8          |    |
| 3   | 2.832 | 437.8          |  |

<sup>a</sup> Only the TDDFT results of the  $T_n$  states lower than  $S_1$  state in energy were given. <sup>b</sup> Isovalue =  $5 \times 10^{-4}$  a.u. The electrons transfer from the blue regions to the purple regions during the excitation from  $S_0$  state to  $T_n$  state.

**Table S6.** The selected singlet-singlet spin-allowed transitions of complex **1** in DMSO at PBE0-D3(BJ)/(Lan12dz+6-31G(d,p)) level<sup>a</sup>

| No. | E(eV) | $\lambda$ (nm) <sup>b</sup> | $f^c$  | EDD map <sup>d</sup>                                                                | Main transition <sup>e</sup>                                                                                                 |
|-----|-------|-----------------------------|--------|-------------------------------------------------------------------------------------|------------------------------------------------------------------------------------------------------------------------------|
| 1   | 2.505 | 495.0 (594.0)               | 0.0154 | 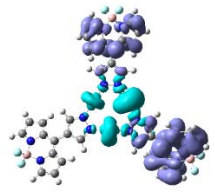 | H $\rightarrow$ L (58.5%),<br>H $\rightarrow$ L+2 (19.2%),<br>H-1 $\rightarrow$ L+2 (8.5%),<br>H-1 $\rightarrow$ L+1 (6.7%), |

|    |       |               |        |                                                                                     |                                                                                              |
|----|-------|---------------|--------|-------------------------------------------------------------------------------------|----------------------------------------------------------------------------------------------|
|    |       |               |        |                                                                                     | H→L+1 (6.5%)                                                                                 |
| 2  | 2.513 | 493.5 (592.2) | 0.0101 | 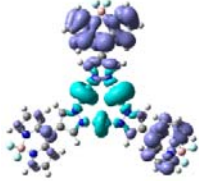   | H→L+2 (33.1%),<br>H→L+1 (32.4%),<br>H-1→L (31.0%)                                            |
| 7  | 2.993 | 414.3 (497.1) | 0.4826 |    | H-5→L (57.0%),<br>H-5→L+1 (11.7%),<br>H-6→L+2 (10.2%),<br>H-5→L+2 (8.2%),<br>H-6→L+1 (6.9%)  |
| 8  | 2.998 | 413.6 (496.3) | 0.4918 |   | H-6→L (55.6%),<br>H-5→L+2 12.5%,<br>H-6→L+1 (10.5%),<br>H-5→L+1 (8.1%),<br>H-6→L+2 (7.1%)    |
| 9  | 3.031 | 409.0 (490.8) | 0.5964 |  | H-2→L (37.8%),<br>H-3→L+1 (16.6%),<br>H-4→L+1 (16.2%),<br>H-3→L+2 (14.6%),<br>H-4→L+2 (9.0%) |
| 10 | 3.035 | 408.6 (490.3) | 0.4380 |  | H-3→L (33.0%),<br>H-2→L+1 (24.7%),<br>H-4→L+2 (10.7%),<br>H-4→L+1 (9.0%),<br>H-2→L+2 (7.9%)  |

<sup>a</sup> Only the TDDFT results of  $S_1$  state and the  $S_n$  states with  $f$  larger than 0.01 among the first 10  $S_n$  states were given. <sup>b</sup> The wavelengths multiplied by 1.2 were given in parentheses. <sup>c</sup> Oscillator strength. <sup>d</sup> Isovalue =  $5 \times 10^{-4}$  a.u. The electrons transfer from the blue regions to the purple regions during the excitation from  $S_0$  state to  $S_n$  state. <sup>e</sup> The main orbital pairs involved in the excitation from  $S_0$  state to  $S_n$  state. H = HOMO, L = LUMO. The transition contributions were provided in parentheses.

**Table S7.** The selected singlet-triplet spin-forbidden transitions of complex **1** in DMSO at PBE0-D3(BJ)/(Lanl2dz+6-31G(d,p)) level<sup>a</sup>

| No. | E(eV) | $\lambda$ (nm) | EDD map <sup>b</sup>                                                                | Main transition <sup>c</sup>                                                                                                                                                                        |
|-----|-------|----------------|-------------------------------------------------------------------------------------|-----------------------------------------------------------------------------------------------------------------------------------------------------------------------------------------------------|
| 1   | 1.738 | 713.2          | 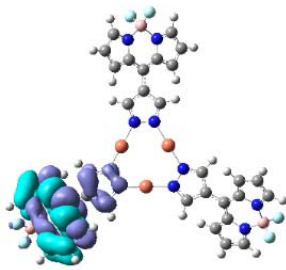   | H-3 $\rightarrow$ L+1 (21.3%),<br>H-2 $\rightarrow$ L+1 (18.0%),<br>H-3 $\rightarrow$ L (17.8%),<br>H-2 $\rightarrow$ L (16.0%),<br>H-3 $\rightarrow$ L+2 (13.2%),<br>H-2 $\rightarrow$ L+2 (11.0%) |
| 2   | 1.739 | 713.0          |   | H-4 $\rightarrow$ L+1 (34.9%),<br>H-4 $\rightarrow$ L (19.6%),<br>H-2 $\rightarrow$ L+1 (14.9%),<br>H-2 $\rightarrow$ L (9.4%),<br>H-4 $\rightarrow$ L+2 (6.4%),<br>H-3 $\rightarrow$ L+1 (6.3%)    |
| 3   | 1.739 | 713.0          |  | H-3 $\rightarrow$ L+2 (22.6%),<br>H-4 $\rightarrow$ L+2 (22.6%),<br>H-2 $\rightarrow$ L+2 (18.7%),<br>H-4 $\rightarrow$ L (13.5%),<br>H-3 $\rightarrow$ L (11.4%),<br>H-2 $\rightarrow$ L (8.5%)    |
| 4   | 2.457 | 504.6          |  | H $\rightarrow$ L (36.4%),<br>H $\rightarrow$ L+1 (13.6%),<br>H-5 $\rightarrow$ L (9.8%),<br>H-1 $\rightarrow$ L+1 (7.6%),<br>H-1 $\rightarrow$ L+2 (5.6%)                                          |

|   |       |       |                                                                                   |                                                                                                               |
|---|-------|-------|-----------------------------------------------------------------------------------|---------------------------------------------------------------------------------------------------------------|
| 5 | 2.459 | 504.3 | 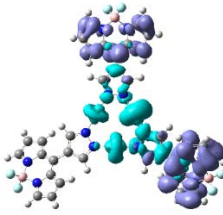 | H→L+2 (37.0%),<br>H→L+1 (14.1%),<br>H-1→L (10.9%),<br>H-5→L+2 (10.3%)                                         |
| 6 | 2.468 | 502.5 |  | H-1→L+1 (23.8%),<br>H-1→L (19.3%),<br>H-1→L+2 (14.8%),<br>H-6→L+1 (10.3%),<br>H-6→L (7.8%),<br>H-6→L+2 (6.6%) |

<sup>a</sup> Only the TDDFT results of the  $T_n$  states lower than  $S_1$  state in energy were given. <sup>b</sup> Isovalue =  $5 \times 10^{-4}$  a.u. The electrons transfer from the blue regions to the purple regions during the excitation from  $S_0$  state to  $T_n$  state. <sup>c</sup> The main orbital pairs involved in the excitation from  $S_0$  state to  $S_n$  state. H = HOMO, L = LUMO. The transition contributions were provided in parentheses.

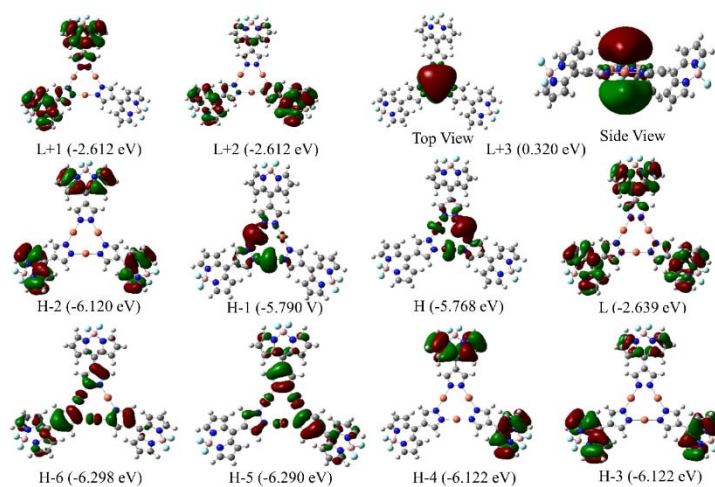

**Fig. S41.** The contours (Isovalue = 0.02) and energy levels (eV) of the selected molecular orbitals of complex **1**. H = HOMO, L = LUMO.



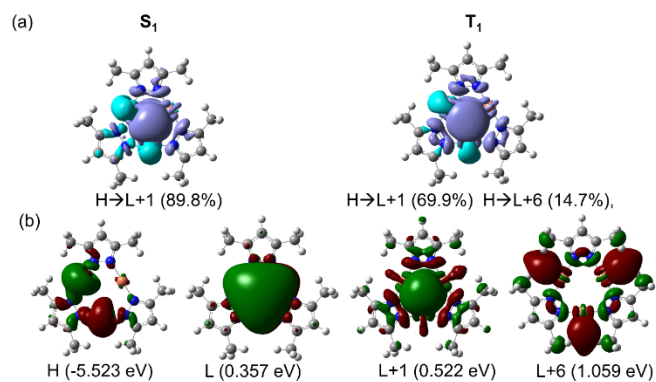

**Fig. S42.** (a) The EDD maps (Isovalue =  $5 \times 10^{-4}$  a.u.) of  $S_1$  and  $T_1$  states of complex **2** and their corresponding main transitions with transition contributions in parentheses. (b) The contours (Isovalue = 0.02) and energy levels of the molecular orbitals involved in the main transitions of  $S_1$  and  $T_1$  states of **2**. H = HOMO, L = LUMO.

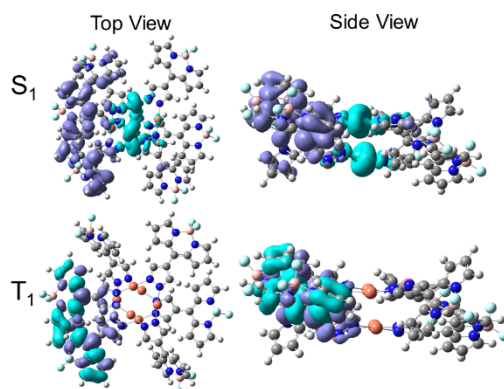

**Fig. S43.** The EDD maps of  $S_1$  and  $T_1$  states of the dimer of complex **1** based on the optimized ground-state geometry (isovalue =  $5 \times 10^{-4}$  a.u.)

### 3.14. Photocatalytic reaction

#### Photooxidation of DHN

The MeCN/MeOH (9:1, v/v) mixed solvent containing DHN (0.15 mM) and photosensitizer (3  $\mu$ M, 2 % mmol) were put into a borosilicate glass tube (50 mL) under an O<sub>2</sub> atmosphere. The solution was then irradiated using a 10 W LED light source of 370-780 nm.

#### Photooxidation of 4-formylphenylboronic acid

The MeCN/CH<sub>2</sub>Cl<sub>2</sub> (5:1, v/v, 6 mL) mixed solvent containing 4-formylphenylboronic acid (14.9 mg, 0.1 mmol), N,N-diisopropylethylamine (DIPEA) (33  $\mu$ L, 0.2 mmol) and photosensitizer (20  $\mu$ M, 0.12 % mmol) were put into a borosilicate glass tube (50 mL) under an O<sub>2</sub> atmosphere. The solution was then irradiated using a 300 W Xenon light source of >420 nm.

#### Photooxidation of thioanisole

The EtOH/H<sub>2</sub>O (1:1, v/v, 4mL) mixed solvent containing thioanisole (37.3 mg, 0.3 mmol) and photosensitizer (20  $\mu$ M, 0.03 % mmol) were put into a borosilicate glass tube (50 mL) under an air atmosphere. The solution was then irradiated using a 10 W LED light source of 370-780 nm.

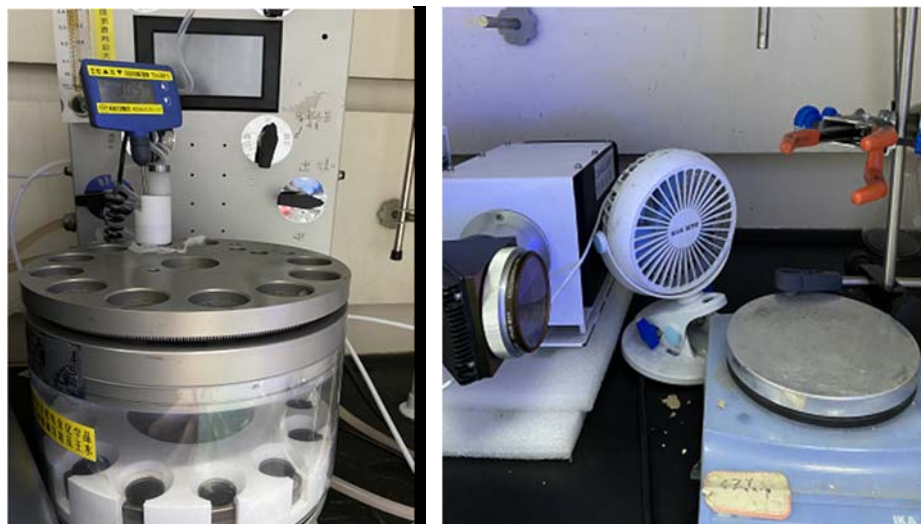

**Fig. S44.** The WP-TEC-1020HSL photooxidation reaction system with the white light LED (10 W) flow reactor is used to perform photooxidation reactions of DHN and thioanisole (left), photooxidation reaction of 4-formylphenylboronic acid was performed with a 300 W Xenon lamp (right).

**Table S8.** Optimization for photooxidation of DHN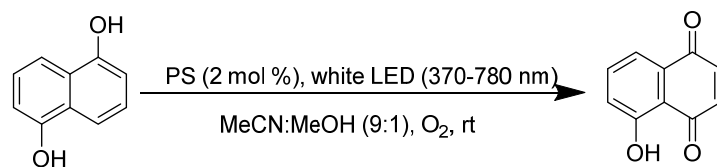

| Entry | catalyst                                               | Solvent         | Reaction time / h | Air or O <sub>2</sub> | yield <sup>a</sup> (%) |
|-------|--------------------------------------------------------|-----------------|-------------------|-----------------------|------------------------|
| 1     | <b>1</b>                                               | MeCN:MeOH (9:1) | 2                 | O <sub>2</sub>        | 84                     |
| 2     | <b>2</b>                                               | MeCN:MeOH (9:1) | 2                 | O <sub>2</sub>        | 72                     |
| 3     | <b>Ir(ppy)<sub>3</sub></b>                             | MeCN:MeOH (9:1) | 2                 | O <sub>2</sub>        | 81                     |
| 4     | <b>1</b>                                               | MeCN:MeOH (9:1) | 2                 | N <sub>2</sub>        | 40                     |
| 5     | <b>HL</b>                                              | MeCN:MeOH (9:1) | 2                 | N <sub>2</sub>        | 71                     |
| 6     | <b>Cu(phen)<sub>2</sub>BF<sub>4</sub><sup>22</sup></b> | MeCN:MeOH (9:1) | 2                 | N <sub>2</sub>        | 73                     |

Reaction conditions: DHN (0.15 mM), PS (2 mol% vs. DHN); solvent (6 mL) and O atm. <sup>a</sup> The reported yield are estimated from the resulting absorbance at 427 nm and the molar extinction coefficient.<sup>23</sup>

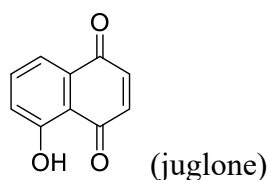

<sup>1</sup>H NMR (400 MHz, 298 K, CDCl<sub>3</sub>) δ 11.94 (s, 1H, OH), 7.66 (d, *J* = 7.5 Hz, 2H, CH<sub>Ph</sub>), 7.32 (d, *J* = 7.5 Hz, 1H, CH<sub>Ph</sub>), 6.98 (s, 2H, CH, CH<sub>Ph</sub>) ppm. <sup>13</sup>C NMR (100 MHz, 298 K, CDCl<sub>3</sub>) δ 190.34, 184.33, 161.47, 139.63, 138.70, 136.63, 131.77, 124.55 119.22, 114.89 ppm.

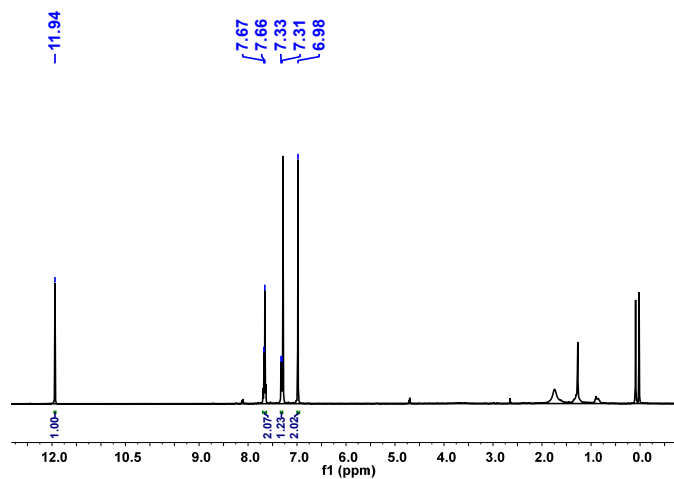

Fig. S45.  $^1\text{H}$  NMR spectrum (400 MHz, 298 K,  $\text{CDCl}_3$ ) of juglone.

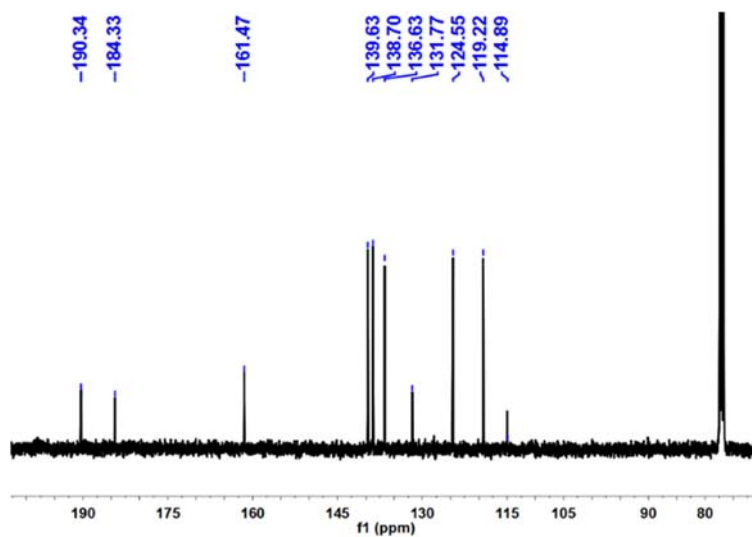

Fig. S46.  $^{13}\text{C}$  NMR spectrum (100 MHz, 298 K,  $\text{CDCl}_3$ ) of juglone.

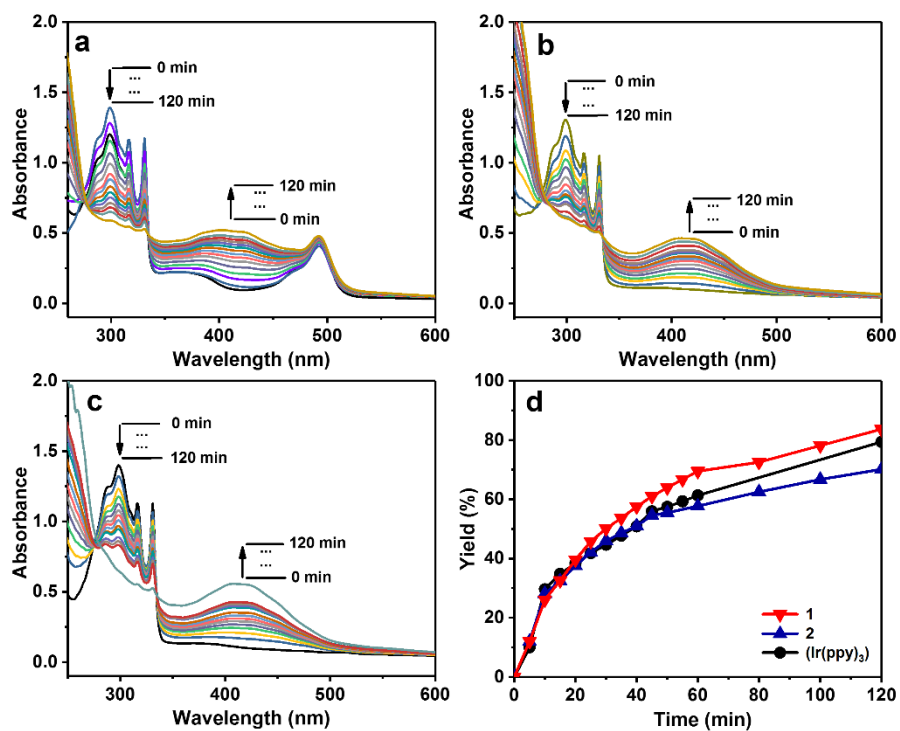

**Fig. S47.** Monitoring the change of the UV-vis absorption spectral for the photooxidation of DHN (0.15 mM) using complexes (a) **1**; (b) **2**; (c)  $\text{Ir(ppy)}_3$  as singlet  $\text{O}_2$  sensitizers; (d) The yields of juglone during 2 h irradiation with different PSs.  $C_{\text{PS}} = 3 \mu\text{M}$  (2 mol % vs. DHN) in MeCN/MeOH (9/1, v/v). Irradiated with a 10 W white LED.

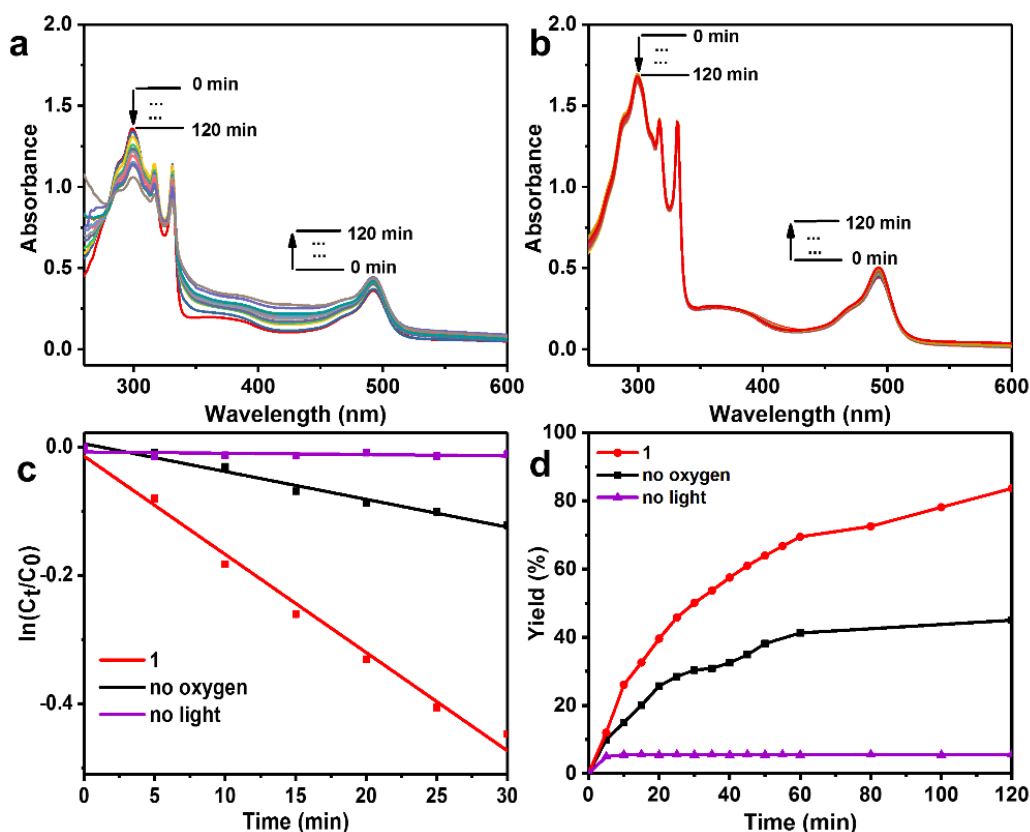

**Fig. S48.** Monitoring the change of the UV-vis absorption spectral change for the photooxidation of DHN (0.15 mM) using complexes **1** under different condition. (a) no oxygen; (b) no light; (c) Plot of  $\ln(C_t/C_0)$  against irradiation time; (d) The yields of juglone during 2 h irradiation with complexes **1** under different condition.  $C_{PS} = 3 \mu\text{M}$  (2 mol % vs. DHN) in MeCN/MeOH (9/1, v/v). Irradiated with a 10 W white LED.

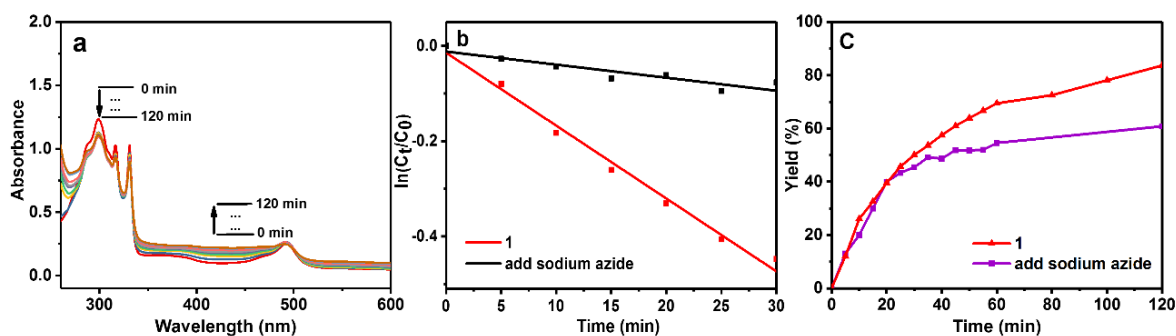

**Fig. S49.** (a) Monitoring the change of the UV-vis absorption spectral change for the photooxidation of DHN (0.15 mM) using complexes **1** with the quencher of  $^1\text{O}_2$ , sodium azide; (b) Plot of  $\ln(C_t/C_0)$  against irradiation time; (c) The yields of juglone during 2 h irradiation with complexes **1** with sodium azide and no sodium azide.  $C_{PS} = 3 \mu\text{M}$  (2 mol % vs. DHN) in MeCN/MeOH (9/1, v/v). Irradiated with a 10 W white LED.

**Table S9.** Optimization for photooxidation of 4-formylphenylboronic acid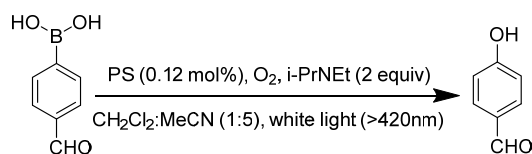

| Entry | catalyst                                             | Solvent                                     | PS loading /<br>mol (%) | Yield<br>(%) |
|-------|------------------------------------------------------|---------------------------------------------|-------------------------|--------------|
| 1     | <b>1</b>                                             | CH <sub>2</sub> Cl <sub>2</sub> :MeCN (1:5) | 1                       | 97           |
| 2     | <b>1</b>                                             | CH <sub>2</sub> Cl <sub>2</sub> :MeCN (1:5) | 0.12                    | 95           |
| 3     | <b>2</b>                                             | CH <sub>2</sub> Cl <sub>2</sub> :MeCN (1:5) | 0.12                    | 5            |
| 4     | <b>Ir(ppy)<sub>3</sub></b>                           | CH <sub>2</sub> Cl <sub>2</sub> :MeCN (1:5) | 0.12                    | 88           |
| 5     | <b>HL</b>                                            | CH <sub>2</sub> Cl <sub>2</sub> :MeCN (1:5) | 0.12                    | 50           |
| 6     | <b>Cu(phen)<sub>2</sub>BF<sub>4</sub></b>            | CH <sub>2</sub> Cl <sub>2</sub> :MeCN (1:5) | 0.12                    | 7            |
| 7     | Cu <sub>2</sub> O                                    | CH <sub>2</sub> Cl <sub>2</sub> :MeCN (1:5) | 0.12                    | NR           |
| 8     | CuI                                                  | CH <sub>2</sub> Cl <sub>2</sub> :MeCN (1:5) | 0.12                    | NR           |
| 9     | Cu(NO <sub>3</sub> ) <sub>2</sub> ·3H <sub>2</sub> O | CH <sub>2</sub> Cl <sub>2</sub> :MeCN (1:5) | 0.12                    | NR           |

Reaction conditions: 4-formylphenylboronic acid (0.1 mmol), PS (0.12 mol% vs. 4-formylphenylboronic acid); solvent (6 mL) and O<sub>2</sub> atm. <sup>a</sup> The reported yields are based on NMR analysis.

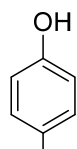

CHO (p-hydroxybenzaldehyde)

<sup>1</sup>H NMR (400 MHz, 298 K, CDCl<sub>3</sub>) δ 9.87 (s, 1H, CH), 7.84 (d, *J* = 8.6 Hz, 2H, CH<sub>Ph</sub>), 7.02 (d, *J* = 8.6 Hz, 2H, CH<sub>Ph</sub>) ppm. <sup>13</sup>C NMR (100 MHz, 298 K, CDCl<sub>3</sub>) δ 191.52, 162.18, 132.62, 129.53, 116.09 ppm.

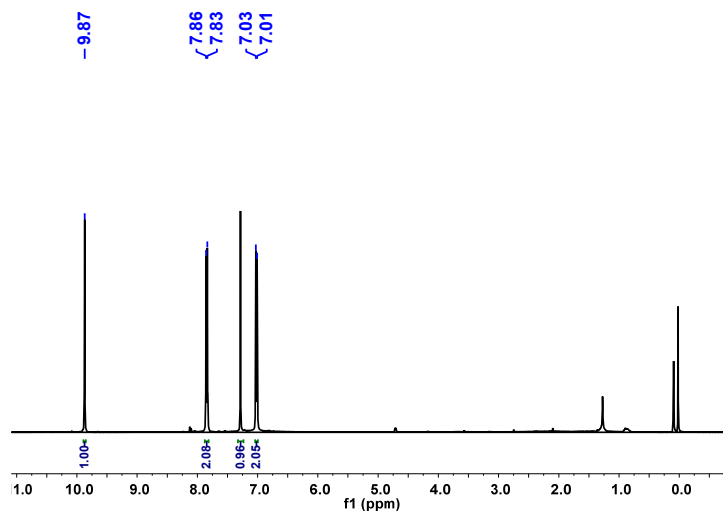

**Fig. S50.**  $^1\text{H}$  NMR spectrum (400 MHz, 298 K,  $\text{CDCl}_3$ ) of p-hydroxybenzaldehyde.

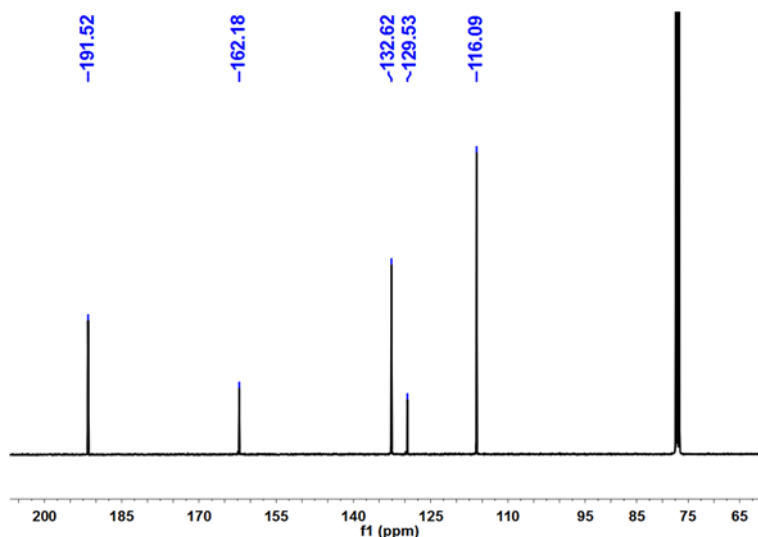

**Fig. S51.**  $^{13}\text{C}$  NMR spectrum (100 MHz, 298 K,  $\text{CDCl}_3$ ) of p-hydroxybenzaldehyde.

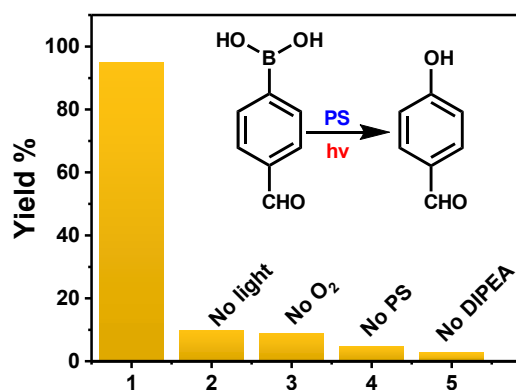

**Fig. S52.** Photocatalytic oxidative of 4-formylphenylboronic acid to p-hydroxybenzaldehyde at different conditions using **1** as photosensitizer.



**Table S10.** Optimization for photooxidation of thioanisole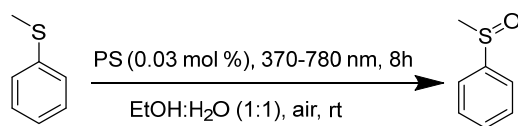

| Entry | catalyst                                             | Solvent                     | Reaction time / h | PS loading / mol (%) | Air or O <sub>2</sub> | Yield (%) |
|-------|------------------------------------------------------|-----------------------------|-------------------|----------------------|-----------------------|-----------|
| 1     | <b>1</b>                                             | MeOH                        | 24                | 0.5                  | O <sub>2</sub>        | 26        |
| 2     | <b>1</b>                                             | EtOH:H <sub>2</sub> O = 1:1 | 24                | 1                    | O <sub>2</sub>        | 99        |
| 3     | <b>1</b>                                             | EtOH:H <sub>2</sub> O = 1:1 | 8                 | 0.03                 | air                   | 99        |
| 4     | <b>2</b>                                             | EtOH:H <sub>2</sub> O = 1:1 | 8                 | 0.03                 | air                   | 3         |
| 6     | <b>Ir(ppy)<sub>3</sub></b>                           | EtOH:H <sub>2</sub> O = 1:1 | 8                 | 0.03                 | air                   | 7         |
| 7     | <b>HL</b>                                            | EtOH:H <sub>2</sub> O = 1:1 | 8                 | 0.03                 | air                   | 99        |
| 8     | <b>Cu(phen)<sub>2</sub>BF<sub>4</sub></b>            | EtOH:H <sub>2</sub> O = 1:1 | 8                 | 0.03                 | air                   | 1         |
| 9     | Cu <sub>2</sub> O                                    | EtOH:H <sub>2</sub> O = 1:1 | 8                 | 0.03                 | air                   | NR        |
| 10    | CuI                                                  | EtOH:H <sub>2</sub> O = 1:1 | 8                 | 0.03                 | air                   | NR        |
| 11    | Cu(NO <sub>3</sub> ) <sub>2</sub> ·3H <sub>2</sub> O | EtOH:H <sub>2</sub> O = 1:1 | 8                 | 0.03                 | air                   | NR        |

Reaction conditions: thioanisole (0.1 mmol), PS (0.03 mol% vs. thioanisole); solvent (4 mL). <sup>a</sup> The reported yields are based on GCMS analysis.

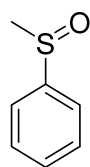

(methyl phenyl sulfoxide)

<sup>1</sup>H NMR (400 MHz, 298 K, CDCl<sub>3</sub>) δ 7.64 (d, *J* = 1.8 Hz, 1H, CH<sub>Ph</sub>), 7.62 (d, *J* = 1.4 Hz, 1H, CH<sub>Ph</sub>), 7.56 – 7.51 (m, 1H, CH<sub>Ph</sub>), 7.50 (s, 1H, CH<sub>Ph</sub>), 7.47 (d, *J* = 6.9 Hz, 1H, CH<sub>Ph</sub>), 2.71 (s, 3H, CH<sub>3</sub>) ppm. <sup>13</sup>C NMR (100 MHz, 298 K, CDCl<sub>3</sub>) δ 145.56, 131.08, 129.38, 123.49, 43.92 ppm.

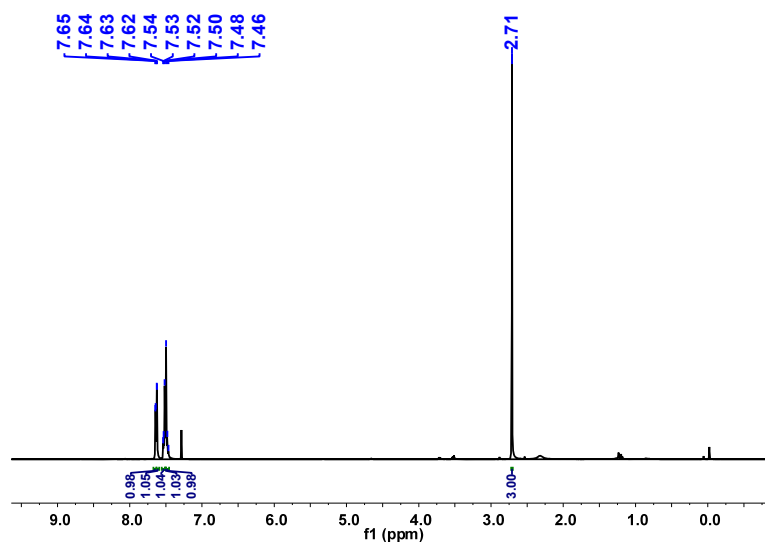

**Fig. S53.**  $^1\text{H}$  NMR spectrum (400 MHz, 298 K,  $\text{CDCl}_3$ ) of methyl phenyl sulfoxide.

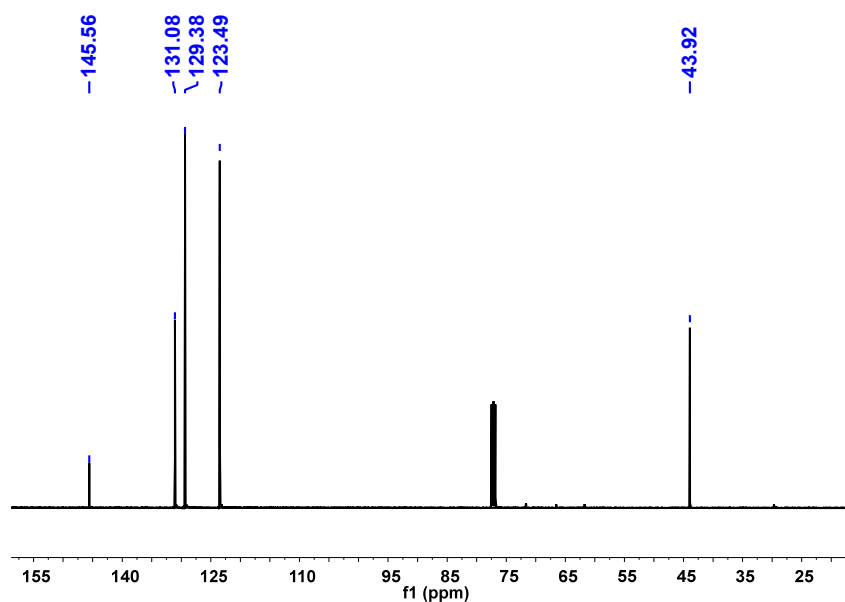

**Fig. S54.**  $^{13}\text{C}$  NMR spectrum (100 MHz, 298 K,  $\text{CDCl}_3$ ) of methyl phenyl sulfoxide.

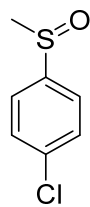

(1-chloro-4-(methylsulfinyl)benzene)

$^1\text{H}$  NMR (400 MHz, 298 K,  $\text{CDCl}_3$ )  $\delta$  7.64 – 7.58 (m, 2H,  $\text{CH}_{\text{Ph}}$ ), 7.55 – 7.50 (m, 2H,  $\text{CH}_{\text{Ph}}$ ), 2.74 (s, 3H,  $\text{CH}_3$ ) ppm.  $^{13}\text{C}$  NMR (100 MHz, 298 K,  $\text{CDCl}_3$ )  $\delta$  144.22 137.26, 129.66, 124.98, 44.06 ppm.

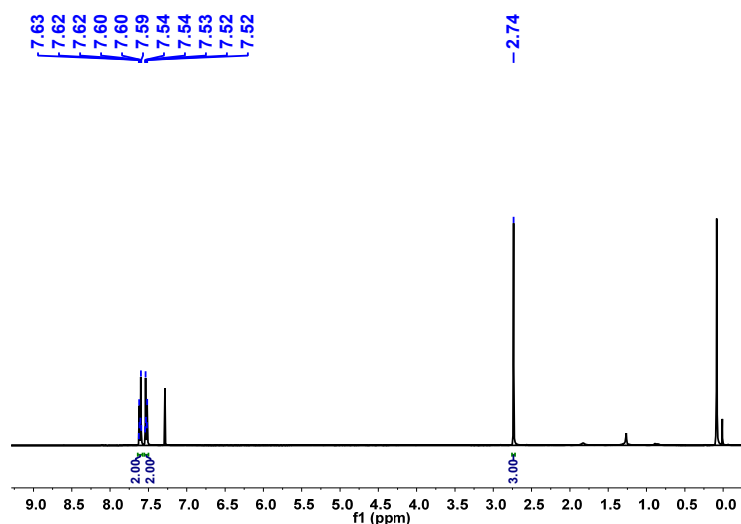

**Fig. S55.**  $^1\text{H}$  NMR spectrum (400 MHz, 298 K,  $\text{CDCl}_3$ ) of 1-chloro-4-(methylsulfinyl)benzene.

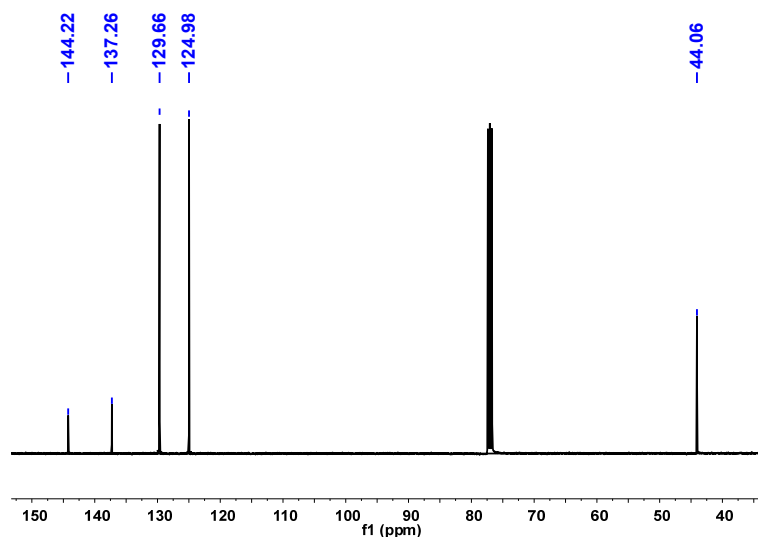

**Fig. S56.**  $^{13}\text{C}$  NMR spectrum (100 MHz, 298 K,  $\text{CDCl}_3$ ) of 1-chloro-4-(methylsulfinyl)benzene.

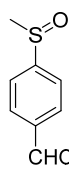

CHO (4-(methylsulfinyl)benzaldehyde)

$^1\text{H}$  NMR (400 MHz, 298 K,  $\text{CDCl}_3$ )  $\delta$  10.07 (s, 1H, CH), 8.03 (d,  $J = 8.0$  Hz, 2H,  $\text{CH}_{\text{Ph}}$ ), 7.80 (d,  $J = 8.0$  Hz, 2H,  $\text{CH}_{\text{Ph}}$ ), 2.77 (s, 3H,  $\text{CH}_3$ ) ppm.  $^{13}\text{C}$  NMR (100 MHz,  $\text{CDCl}_3$ )  $\delta$  191.18, 152.47, 138.12, 130.41, 124.18, 43.79 ppm.

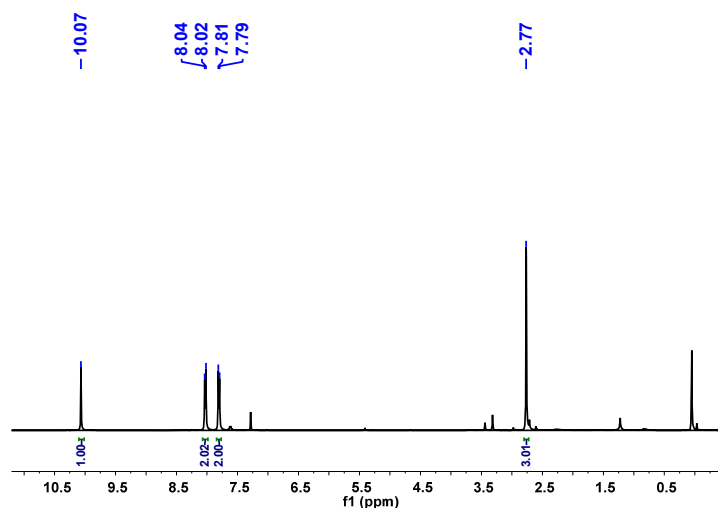

**Fig. S57.**  $^1\text{H}$  NMR spectrum (400 MHz, 298 K,  $\text{CDCl}_3$ ) of 4-(methylsulfinyl)benzaldehyde.

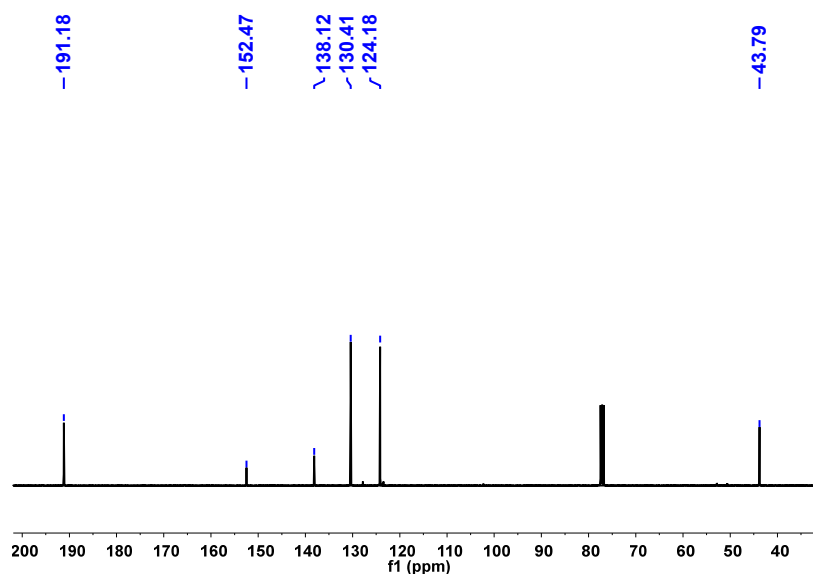

**Fig. S58.**  $^{13}\text{C}$  NMR spectrum (100 MHz, 298 K,  $\text{CDCl}_3$ ) of 4-(methylsulfinyl)benzaldehyde.

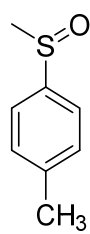

(1-methyl-4-(methylsulfinyl)benzene)

$^1\text{H}$  NMR (400 MHz, 298 K,  $\text{CDCl}_3$ )  $\delta$  7.53 (d,  $J$  = 7.9 Hz, 2H,  $\text{CH}_{\text{Ph}}$ ), 7.32 (d,  $J$  = 7.8 Hz, 2H,  $\text{CH}_{\text{Ph}}$ ), 2.70 (s, 3H,  $\text{CH}_3$ ), 2.41 (s, 3H,  $\text{CH}_3$ ) ppm.  $^{13}\text{C}$  NMR (100 MHz, 298 K,  $\text{CDCl}_3$ )  $\delta$  142.44, 141.52, 130.03, 123.55, 44.00, 21.40 ppm.

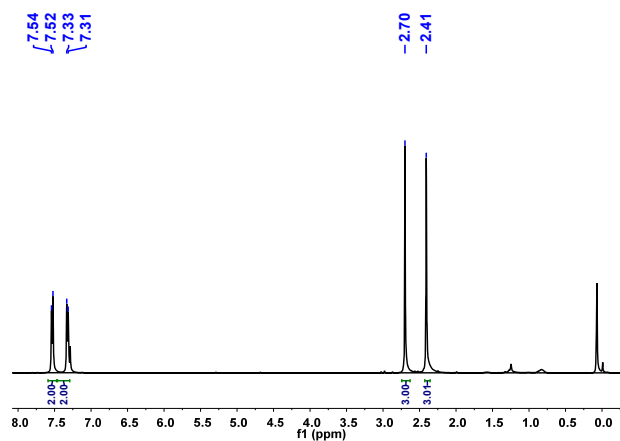

**Fig. S59.**  $^1\text{H}$  NMR spectrum (400 MHz, 298 K,  $\text{CDCl}_3$ ) of 1-methyl-4-(methylsulfinyl)benzene.

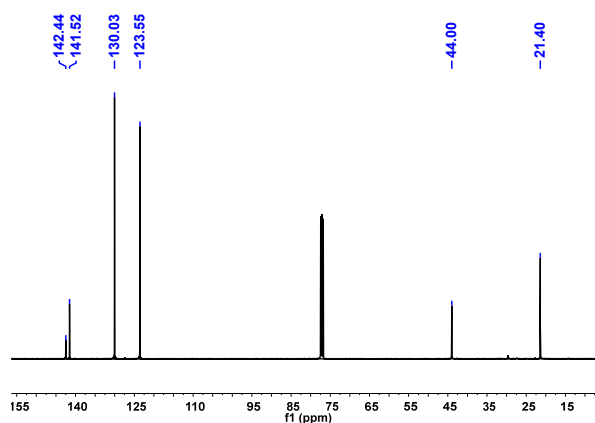

**Fig. S60.**  $^{13}\text{C}$  NMR spectrum (100 MHz, 298 K,  $\text{CDCl}_3$ ) of 1-methyl-4-(methylsulfinyl)benzene.

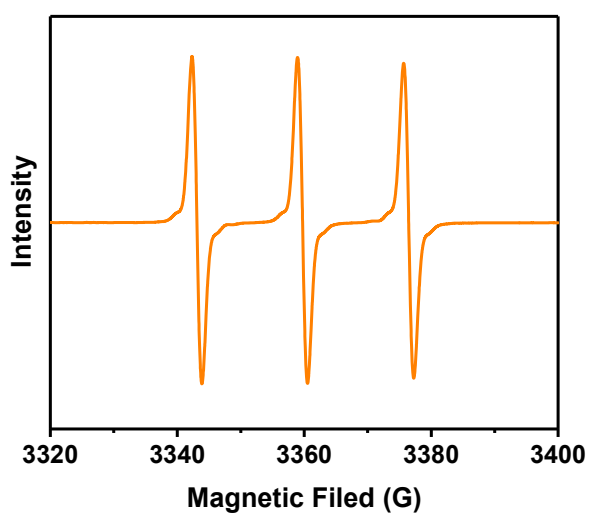

**Fig. S61.** EPR spectrum of **1** (0.001 mmol) in the presence of 0.3 mmol of TEMPO in mixture solution of EtOH and  $\text{H}_2\text{O}$  (1:1, v/v) under air.

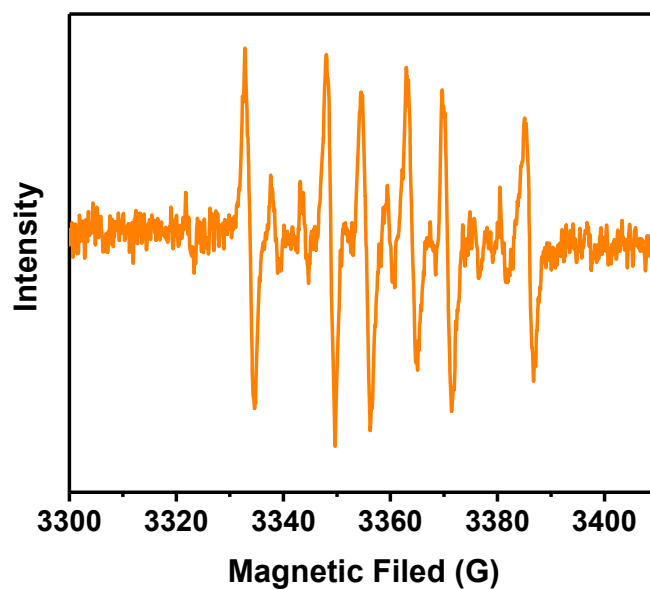

**Fig. S62.** EPR spectrum of **1** (0.001 mmol) in the presence of 0.3 mmol of DMPO in mixture solution of EtOH and H<sub>2</sub>O (1:1, v/v) under air.

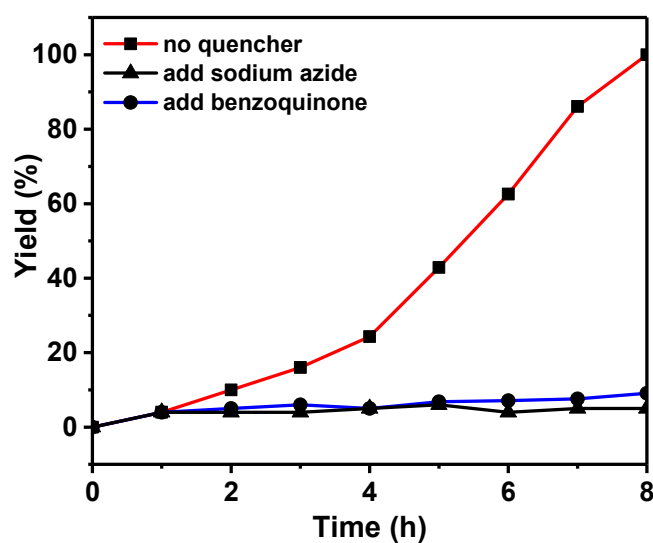

**Fig. S63.** The yields of methyl phenyl sulfoxide during 8 h irradiation with **1**, **1**+ BQ, and **1** + sodium azide in EtOH/H<sub>2</sub>O (1/1, v/v). C<sub>PS</sub>=20.0 μM (0.03 mol% vs substrates). Irradiated with a 10 W LED lamp.

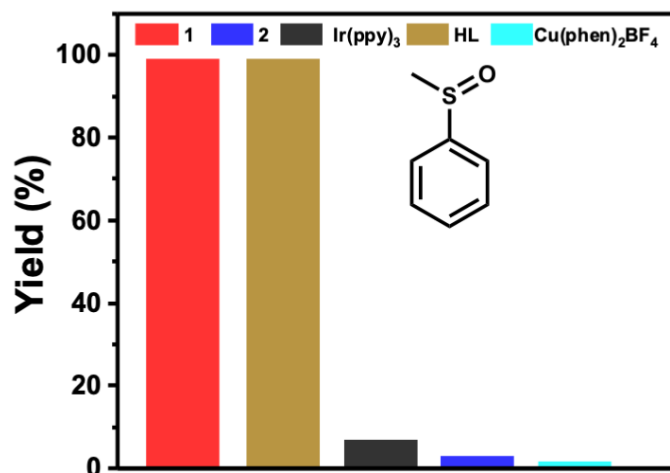

**Fig. S64.** Comparison of yields of methyl phenyl sulfoxide using different PSs including **1**, **2**, Ir(ppy)<sub>3</sub>, HL and Cu(phen)<sub>2</sub>BF<sub>4</sub>.

**Table 11.** Optimization of reaction conditions for the synthesis of (1,3,3,3-tetrabromopropyl)benzene<sup>a</sup>

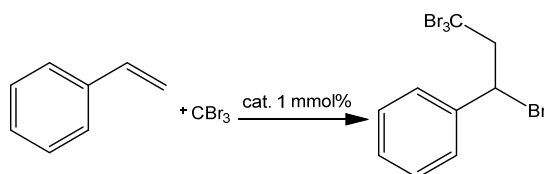

| Entry | catalyst                                  | Solvent                         | Catalyst loading / mol (%) | Yield (%) <sup>b</sup> |
|-------|-------------------------------------------|---------------------------------|----------------------------|------------------------|
| 1     | <b>HL</b>                                 | CH <sub>2</sub> Cl <sub>2</sub> | 1                          | 18                     |
| 2     | <b>1</b>                                  | CH <sub>2</sub> Cl <sub>2</sub> | 1                          | 55                     |
| 3     | <b>2</b>                                  | CH <sub>2</sub> Cl <sub>2</sub> | 1                          | 49                     |
| 4     | <b>Cu(phen)<sub>2</sub>BF<sub>4</sub></b> | CH <sub>2</sub> Cl <sub>2</sub> | 1                          | 64                     |

<sup>a</sup> Model reaction conditions: alkene (0.2 mmol), carbon tetrabromide (0.2 mmol) in dichloromethane (1.0 mL) under irradiation of 90 W white LED in N<sub>2</sub> atmosphere at rt for 24 h. <sup>b</sup> The yield of (1,3,3,3-tetrabromopropyl)benzene was determined by <sup>1</sup>H NMR with 1,1,2,2-tetrachloroethane as internal standard.

**Table 12.** Optimization of reaction conditions for the synthesis of 2-phenyl-1-(phenylethynyl)-1,2,3,4-tetrahydroisoquinoline<sup>a</sup>

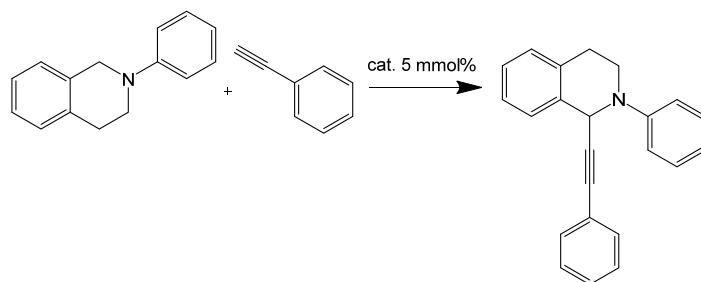

| Entry | catalyst                                  | Solvent | Catalyst loading / mol (%) | Yield (%) <sup>b</sup> |
|-------|-------------------------------------------|---------|----------------------------|------------------------|
| 1     | <b>HL</b>                                 | MeCN    | 5                          | 2                      |
| 2     | <b>1</b>                                  | MeCN    | 5                          | 43                     |
| 3     | <b>2</b>                                  | MeCN    | 5                          | 4                      |
| 4     | <b>Cu(phen)<sub>2</sub>BF<sub>4</sub></b> | MeCN    | 5                          | 39                     |

<sup>a</sup>Model reaction conditions: 2-phenyl-1,2,3,4-tetrahydroisoquinoline (0.1 mmol), ethynylbenzene (0.1 mmol) in acetonitrile (1.0 mL) under irradiation of 10 W white LED in air at rt for 12 h. <sup>b</sup>The yield of 2-phenyl-1-(phenylethynyl)-1,2,3,4-tetrahydroisoquinoline was determined by <sup>1</sup>H NMR with 1,1,2,2-tetrachloroethane as internal standard.

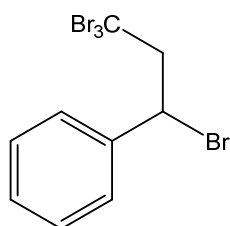

(1,3,3,3-tetrabromopropyl)benzene)

<sup>1</sup>H NMR (400 MHz, 298 K, CDCl<sub>3</sub>) δ 7.50 (d, J = 7.0 Hz, 2H, CH<sub>Ph</sub>), 7.37 (t, J = 7.3 Hz, 2H, CH<sub>Ph</sub>), 7.31 (t, J = 7.2 Hz, 2H, CH<sub>Ph</sub>), 5.34 (dd, J = 7.7 Hz, 4.1 Hz, 1H, CH), 4.13 (dd, J = 15.5 Hz, 4.1 Hz, 1H, CH<sub>2</sub>), 4.06 (dd, J = 15.6 Hz, 7.7 Hz, 1H, CH<sub>2</sub>) ppm. <sup>13</sup>C NMR (100 MHz, 298 K, CDCl<sub>3</sub>) δ 140.79, 129.22, 128.94, 128.18, 127.69, 66.45, 50.09, 35.07 ppm.



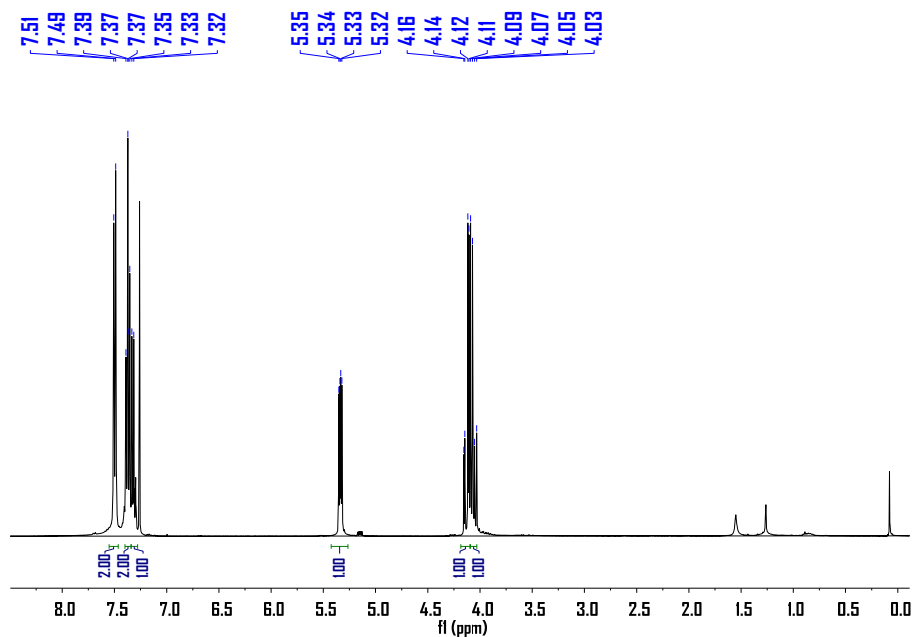

**Fig. S65.**  $^1\text{H}$  NMR spectrum (400 MHz, 298 K,  $\text{CDCl}_3$ ) of 1,3,3,3-tetrabromopropylbenzene.

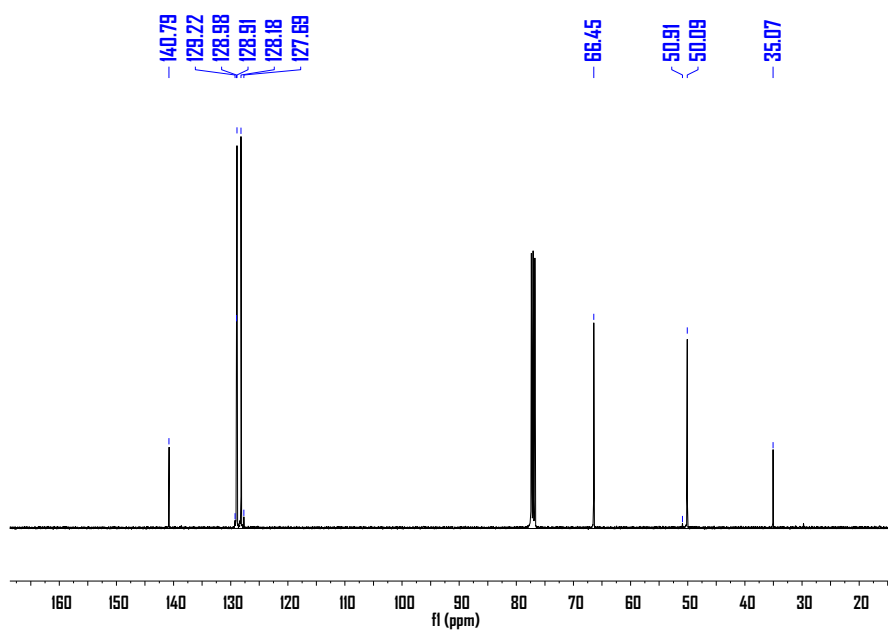

**Fig. S66.**  $^{13}\text{C}$  NMR spectrum (100 MHz, 298 K,  $\text{CDCl}_3$ ) of 1,3,3,3-tetrabromopropylbenzene.

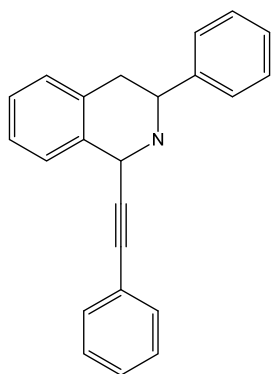

(2-phenyl-1-(phenylethynyl)-1,2,3,4-tetrahydroisoquinoline)

$^1\text{H}$  NMR (400 MHz, 298 K,  $\text{CDCl}_3$ )  $\delta$  7.43 – 7.27 (m, 6H,  $\text{CH}_{\text{Ph}}$ ), 7.24 (m, 5H,  $\text{CH}_{\text{Ph}}$ ), 7.15 (d,  $J = 8.2$  Hz, 2H,  $\text{CH}_{\text{Ph}}$ ), 6.91 (t,  $J = 7.2$  Hz, 1H,  $\text{CH}_{\text{Ph}}$ ), 5.66 (s, 1H, CH), 3.77–3.63 (m, 2H,  $\text{CH}_2$ ), 3.18 (dd,  $J = 14.2, 8.1$  Hz, 1H,  $\text{CH}_2$ ), 3.05 – 2.95 (m, 1H,  $\text{CH}_2$ ) ppm.  $^{13}\text{C}$  NMR (100 MHz, 298 K,  $\text{CDCl}_3$ )  $\delta$  149.40, 135.29, 134.33, 131.75, 129.16, 128.94, 128.09, 128.06, 127.44, 127.27, 126.31, 122.96, 116.84, 88.43, 84.92, 77.25, 52.45, 43.57, 28.87 ppm.

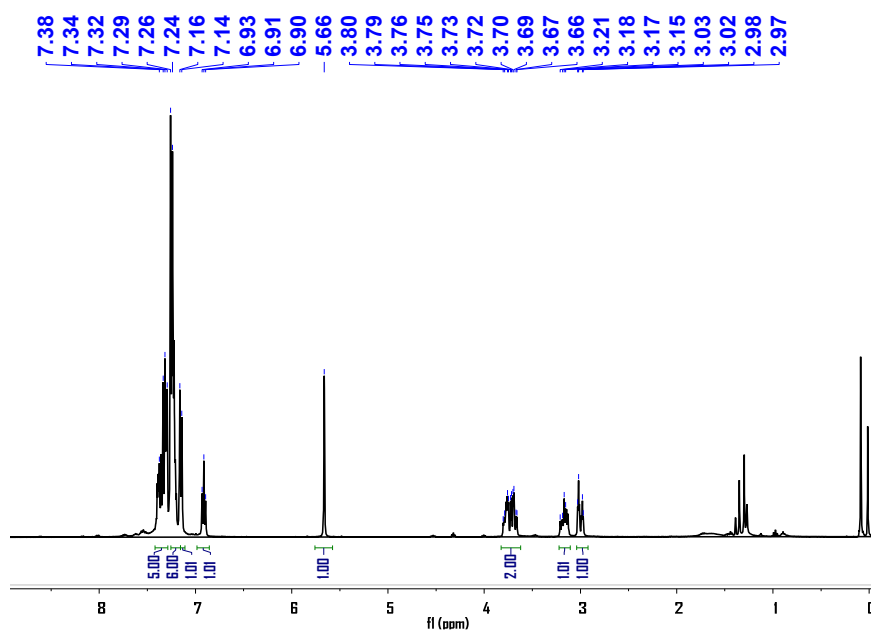

**Fig. S67.**  $^1\text{H}$  NMR spectrum (400 MHz, 298 K,  $\text{CDCl}_3$ ) of 2-phenyl-1-(phenylethynyl)-1,2,3,4-tetrahydroisoquinoline.

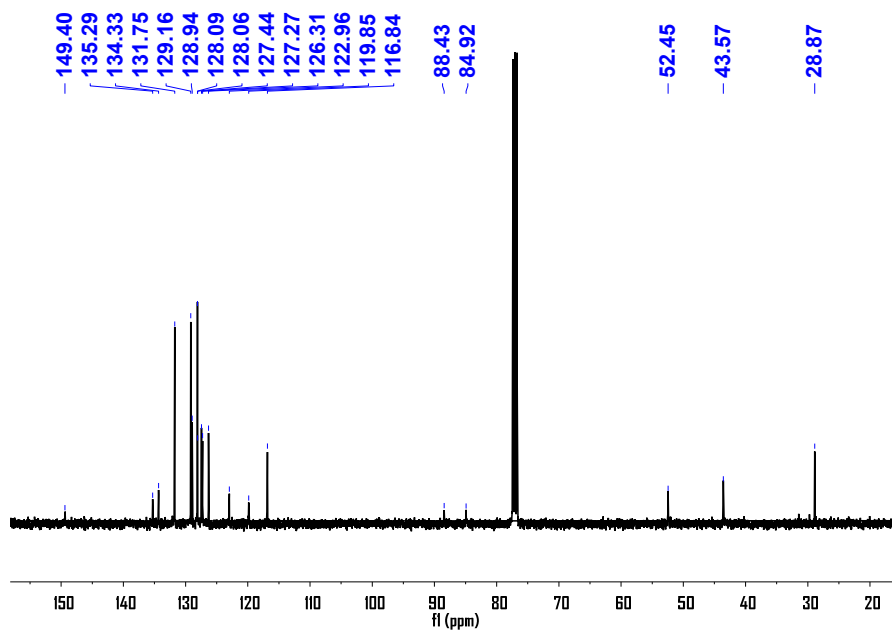

**Fig. S68.**  $^{13}\text{C}$  NMR spectrum (100 MHz, 298 K,  $\text{CDCl}_3$ ) of 2-phenyl-1-(phenylethynyl)-1,2,3,4-tetrahydroisoquinoline.

### 3.15. Photooxidation stability test

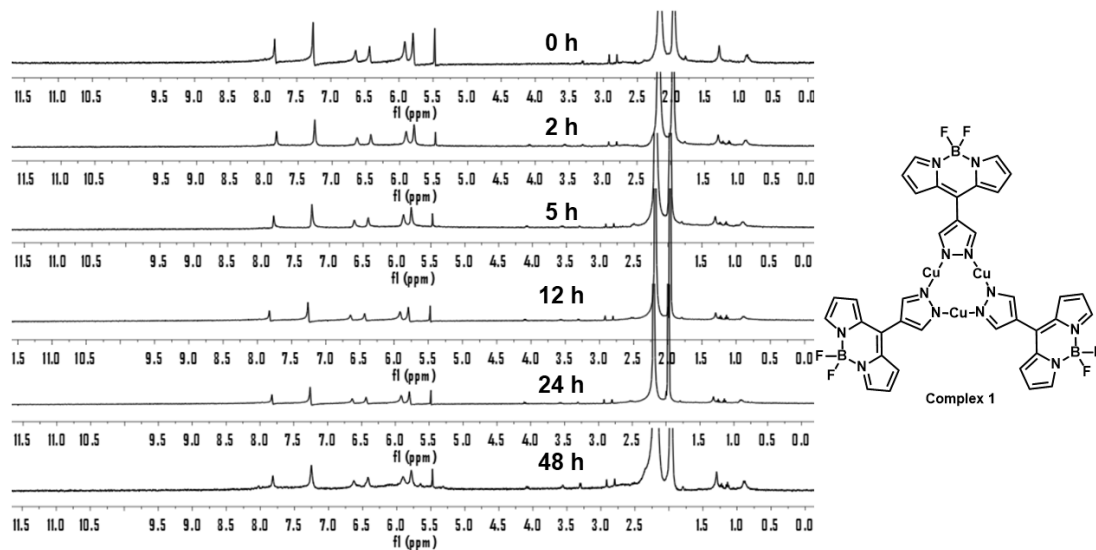

**Fig. S69.**  $^1\text{H}$  NMR spectra (400 MHz, 298 K,  $\text{CD}_3\text{CN}$ ) of complex 1 under 10 W white light irradiation.

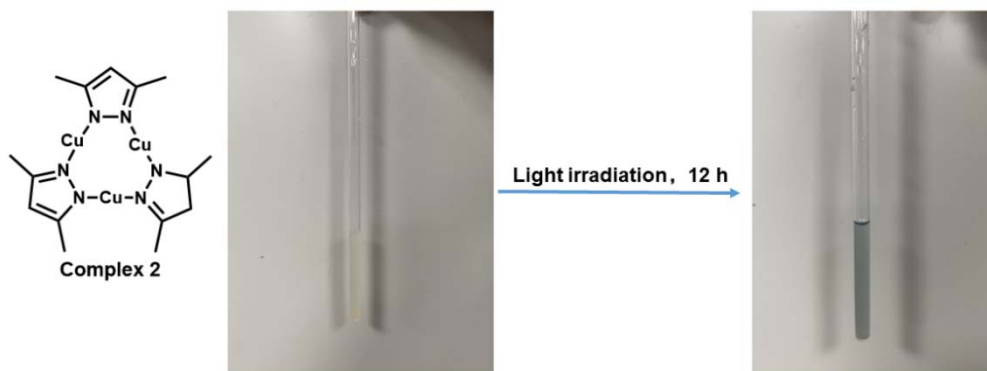

**Fig. S70.** The pictures of complex 2 before light irradiation and after 10 W white light irradiation for 12 h.

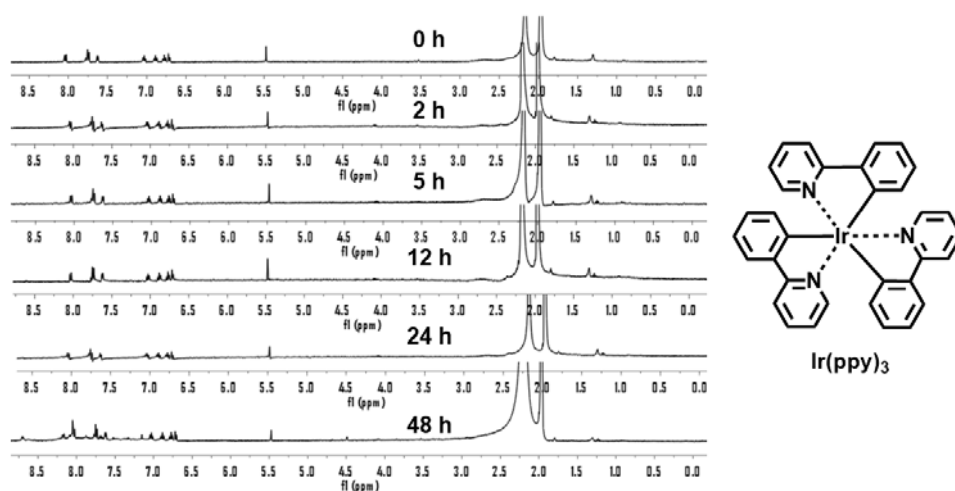

**Fig. S71.** <sup>1</sup>H NMR spectra (400 MHz, 298 K, CD<sub>3</sub>CN) of Ir(ppy)<sub>3</sub> under 10 W white light irradiation.

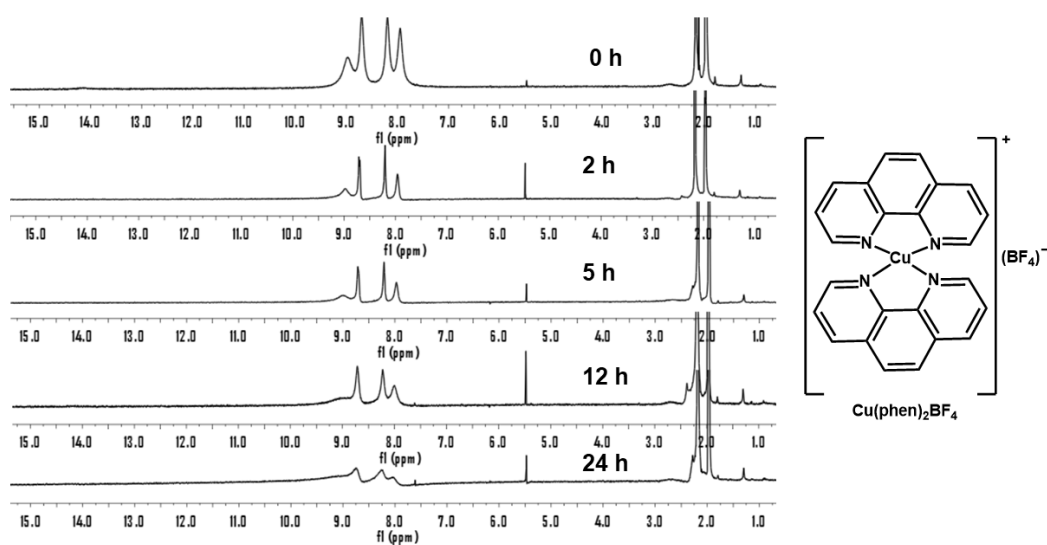

**Fig. S72.** <sup>1</sup>H NMR spectra (400 MHz, 298 K, CD<sub>3</sub>CN) of Cu(phen)<sub>2</sub>BF<sub>4</sub> under 10 W white light irradiation.

## References

- 1 R. Liang, S.-S. Sun, G. Huang and M.-D. Li, Unveiling the Photophysical and Photochemical Reaction Process of Naproxen via Ultrafast Femtosecond to Nanosecond Laser Flash Photolysis, *Chem. Res. Toxicol.*, 2019, **32**, 613-620.
- 2 Z. Deng, S. Sun, M. Zhou, G. Huang, J. Pang, L. Dang and M.-D. Li, Revealing Ultrafast Energy Dissipation Pathway of Nanocrystalline Sunscreens Oxybenzone and Dioxybenzone, *J. Phys. Chem. Lett.*, 2019, **10**, 6499-6503.
- 3 T. V. Goud, A. Tutar and J.-F. Biellmann, Synthesis of 8-heteroatom-substituted 4,4-difluoro-4-bora-3a,4a-diaza-s-indacene dyes (BODIPY), *Tetrahedron*, 2006, **62**, 5084-5091.
- 4 X.-L. Lv, K. Wang, B. Wang, J. Su, X. Zou, Y. Xie, J.-R. Li and H.-C. Zhou, A Base-Resistant Metalloporphyrin Metal–Organic Framework for C–H Bond Halogenation, *J. Am. Chem. Soc.*, 2017, **139**, 211-217.
- 5 M. K. Ehlert, S. J. Rettig, A. Storr, R. C. Thompson and J. Trotter, Synthesis and X-ray crystal structure of the 3,5-dimethylpyrazolato copper(I) trimer, [Cu(pz'')]<sub>3</sub>, *Can. J. Chem.*, 1990, **68**, 1444-1449.
- 6 H. V. R. Dias, H. V. K. Diyabalanage, M. G. Eldabaja, O. Elbjeirami, M. A. Rawashdeh-Omary and M. A. Omary, Brightly Phosphorescent Trinuclear Copper(I) Complexes of Pyrazolates: Substituent Effects on the Supramolecular Structure and Photophysics, *J. Am. Chem. Soc.*, 2005, **127**, 7489-7501.
- 7 G. Sheldrick, A short history of SHELX, *Acta Cryst. A*, 2008, **64**, 112-122.
- 8 O. V. Dolomanov, L. J. Bourhis, R. J. Gildea, J. A. K. Howard and H. Puschmann, OLEX2: a complete structure solution, refinement and analysis program, *J. Appl. Cryst.*, 2009, **42**, 339-341.
- 9 M. J. Frisch, G. W. Trucks, H. B. Schlegel, G. E. Scuseria, M. A. Robb, J. R. Cheeseman, G. Scalmani, V. Barone, B. Mennucci, G. A. Petersson, H. Nakatsuji, M. Caricato, X. Li, H. P. Hratchian, A. F. Izmaylov, J. Bloino, G. Zheng, J. L. Sonnenberg, M. Hada, M. Ehara, K. Toyota, R. Fukuda, J. Hasegawa, M. Ishida, T. Nakajima, Y. Honda, O. Kitao, H. Nakai, T. Vreven, Jr. J. A. Montgomery, J. E.

- Peralta, F. Ogliaro, M. Bearpark, J. J. Heyd, E. Brothers, K. N. Kudin, V. N. Staroverov, R. Kobayashi, J. Normand, K. Raghavachari, A. Rendell, J. C. Burant, S. S. Iyengar, J. Tomasi, M. Cossi, N. Rega, J. M. Millam, M. Klene, J. E. Knox, J.B. Cross, V. Bakken, C. Adamo, J. Jaramillo, R. Gomperts, R. E. Stratmann, O. Yazyev, A. J. Austin, R. Cammi, C. Pomelli, J. Ochterski, R. L. Martin, K. Morokuma, V. G. Zakrzewski, G. A. Voth, P. Salvador, J. J. Dannenberg, S. Dapprich, A. D. Daniels, O. Farkas, J. B. Foresman, J. V. Ortiz, J. Cioslowski and D. J. Fox, Gaussian 09 (Revision E.01), Gaussian, Inc., Wallingford, CT, 2013.
- 10 J. P. Perdew, K. Burke and M. Ernzerhof, Generalized Gradient Approximation Made Simple, *Phys. Rev. Lett.*, 1996, **77**, 3865-3868.
  - 11 J. P. Perdew, K. Burke and M. Ernzerhof, Generalized Gradient Approximation Made Simple [Phys. Rev. Lett. 77, 3865 (1996)], *Phys. Rev. Lett.*, 1997, **78**, 1396.
  - 12 S. Grimme, J. Antony, S. Ehrlich and H. Krieg, A consistent and accurate ab initio parametrization of density functional dispersion correction (DFT-D) for the 94 elements H-Pu, *J. Chem. Phys.*, 2010, **132**, 154104.
  - 13 S. Grimme, S. Ehrlich and L. Goerigk, Effect of the damping function in dispersion corrected density functional theory, *J. Comput. Chem.*, 2011, **32**, 1456–1465.
  - 14 T. H. Dunning, Jr., and P. J. Hay, In Modern Theoretical Chemistry; Schaefer, H. F., III., Ed.; Plenum: New York, 1976, Vol. 3, pp 1–28.
  - 15 P. J. Hay and W. R. Wadt, *Ab initio* effective core potentials for molecular calculations. Potentials for the transition metal atoms Sc to Hg, *J. Chem. Phys.*, 1985, **82**, 270.
  - 16 W. R. Wadt and P. J. Hay, *Ab initio* effective core potentials for molecular calculations. Potentials for main group elements Na to Bi, *J. Chem. Phys.*, 1985, **82**, 284.
  - 17 P. J. Hay and W. R. Wadt, *Ab initio* effective core potentials for molecular calculations. Potentials for K to Au including the outermost core orbitals, *J. Chem. Phys.*, 1985, **82**, 299.
  - 18 P. C. Hariharan, and J. A. Pople, Accuracy of AH<sub>n</sub> equilibrium Geometries by

- Single Determinant Molecular Orbital Theory, *Mol. Phys.*, 1974, **27**, 209.
- 19 A. V. Marenich, C. J. Cramer and D. G. Truhlar, Universal Solvation Model Based on Solute Electron Density and on a Continuum Model of the Solvent Defined by the Bulk Dielectric Constant and Atomic Surface Tensions. *J. Phys. Chem. B*, 2009, **113**, 6378-6396.
  - 20 T. Lu and F. Chen, Multiwfn: A multifunctional wavefunction analyzer, *J. Comput. Chem.*, 2012, **33**, 580-592.
  - 21 Z. Liu, T. Lu, Q. Chen, An sp-hybridized all-carboatomic ring, cyclo[18]carbon: Electronic structure, electronic spectrum, and optical nonlinearity, *Carbon*, 2020, **165**, 461-467.
  - 22 H. Fuwa, Total synthesis of tetrahydropyran-containing natural products exploiting intramolecular oxa-conjugate cyclization, *Heterocycles*, 2012, **85**, 1255-1298.
  - 23 S.-Y. Takizawa, R. Aboshi and S. Murata, Photooxidation of 1,5-dihydroxynaphthalene with iridium complexes as singlet oxygen sensitizers, *Photochem. Photobiol. Sci.*, 2011, **10**, 895-903.
